# Supplementary material for: Enrichment of low-frequency functional variants revealed by whole-genome sequencing of multiple isolated European populations
Source: PubMed Central journal article supplement (PMC5490002; doi:10.1038/ncomms15927), 2017-06-23
Supplement: ncomms15927-s1.pdf [file ncomms15927-s1.pdf]

Type of file: PDF

Size of file: 0 KB

Title of file for HTML: Supplementary Information

Description: Supplementary Figures, Supplementary Tables, Supplementary Notes and Supplementary References

Type of file: pdf

File size:

Title of file for HTML: Peer Review File

Description:

## Supplementary Figures

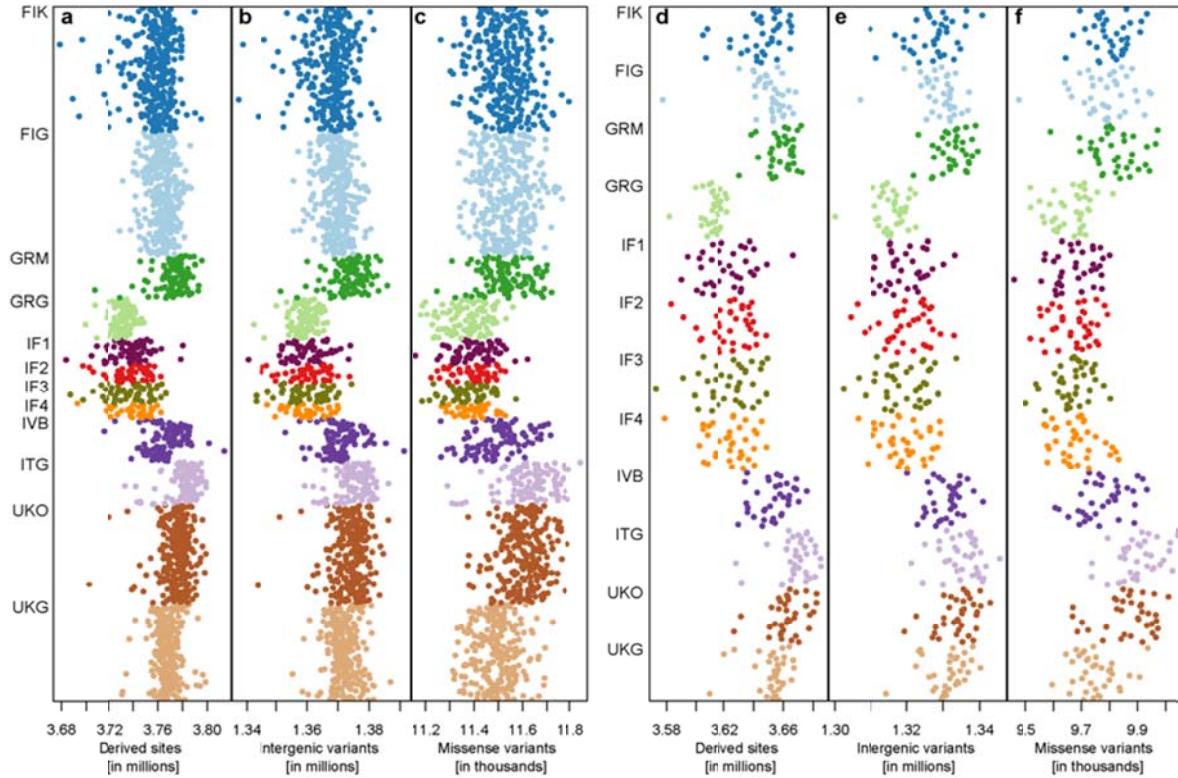

Supplementary Figure 1. Variant sites based on derived allele count in each individual. Left panels (a, b, c) are based on the matched-sample-size and right panels (d, e, f) are based on the minimum-sample-size. The x-axis shows the number of variant sites, and each individual is plotted on the y-axis. The numbers are slightly higher for most of the categories using the sample-size-matched dataset compared with the minimum-sample-size dataset, as the rare variant numbers increase when samples size increase, but the alternative alleles of some these variants are ancestral, which will increase the derived site counts in most of the individuals. We found that singleton counts decrease as sample sizes increase, which is as expected. More variation of the counts is seen in the general populations than in the isolates. Overall, only the Friuli Venezia Giulia isolates - IF1, IF2, IF3 and IF4 - showed lower total variant counts compared to the general population, as is expected. All other isolates showed the opposite pattern, which is most likely due to the ascertainment in sample selection by maximizing the haplotype diversity in each population. GRG showed very low variant counts, which is due to the different variant calling procedure in this population.

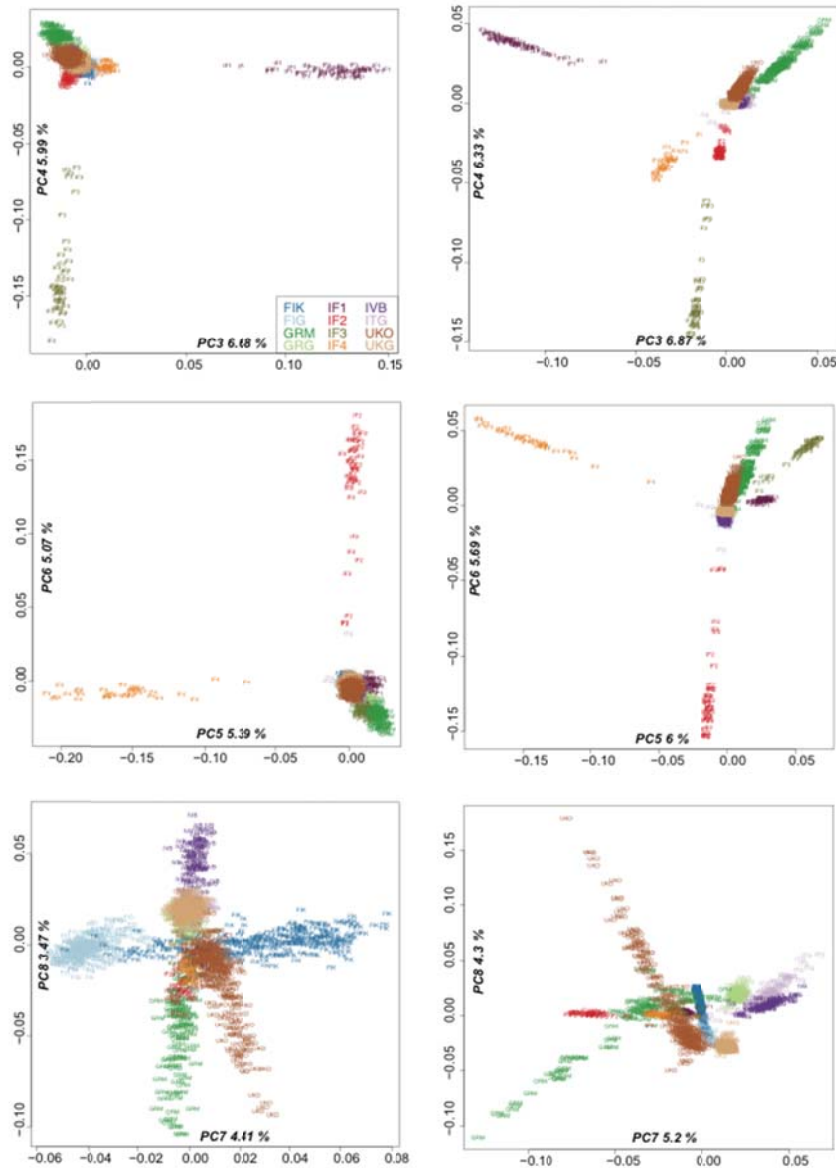

Supplementary Figure 2. PCA plots based on pruned variant dataset with  $r^2 < 0.4$  comparing common variants (MAF  $> 0.05$  across all the populations; left) with rare variants (MAF across all the populations ranging between 0.01 and 0.05; right). We used the whole dataset for these analyses, and PCAs were performed using EIGENSTRAT v.501<sup>1</sup>. Populations mostly clustered on the PCA according to their geographic locations, and the isolates were positioned close to their corresponding general populations: for example, UKO next to UKG; FIK next to FIG, while all populations from Italy clustered together. The most interesting and striking finding is that the PCA with rare variants separated the populations with higher resolution than that with common variants, especially for the isolated populations from Italy. For example, PC3 and PC4 with rare variants show well-differentiated clusters for IF1, IF2, IF3 and IF4. PC7 and PC8 show additional differentiation for FIK, GRM, IVB and UKO (right panel).

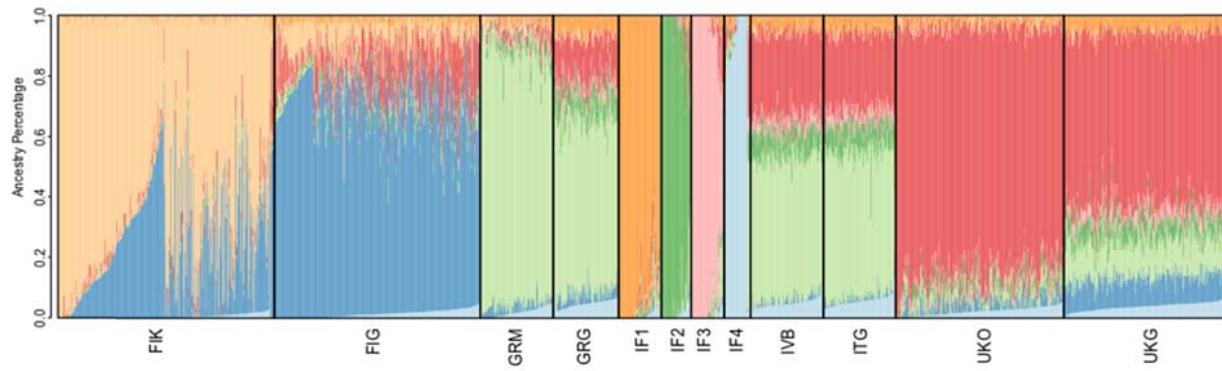

Supplementary Figure 3. ADMIXTURE graph of the populations studied here with K=8. Shared ancestry between the populations studied here was evaluated using ADMIXTURE v1.22<sup>2</sup>, with the whole dataset. The optimal number of clusters was assessed through the cross-validation error procedure<sup>2</sup>. Each ADMIXTURE run was replicated five times with different random seeds. Each isolate shared ancestry components with its closest general population.

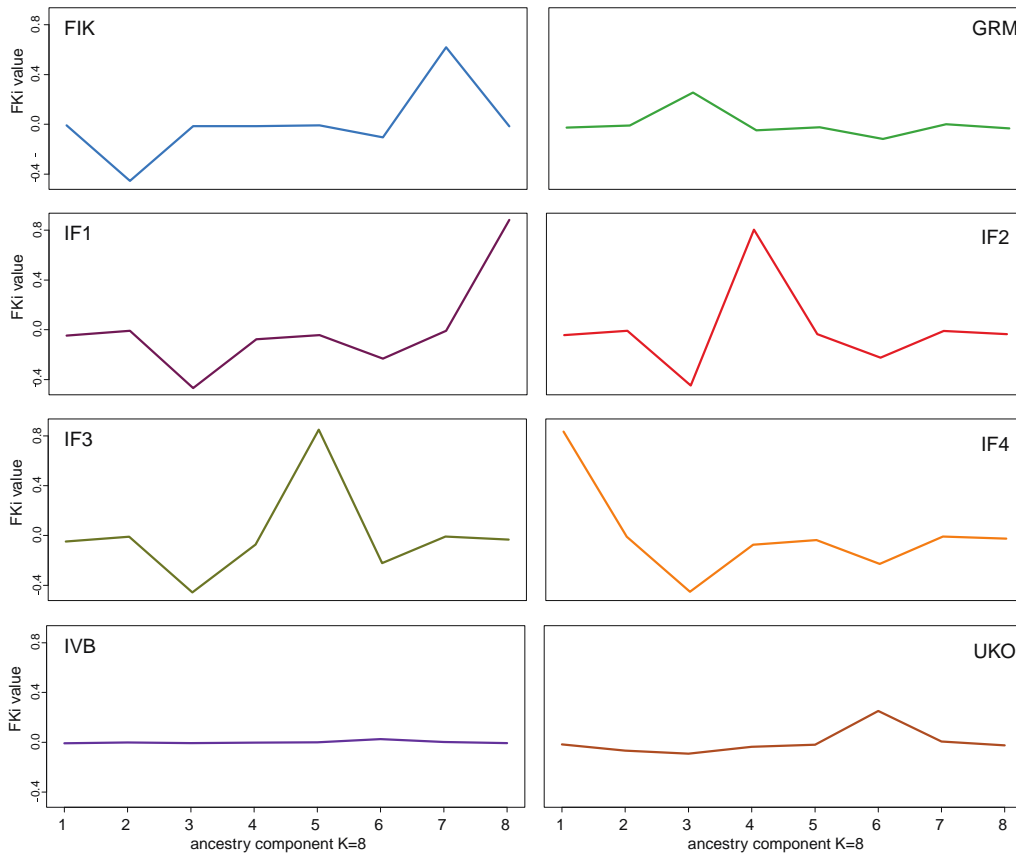

Supplementary Figure 4. FK<sub>i</sub> values for each population for the ADMIXTURE run with K=8.  $FK_i = fki_{\text{isolate}} - fki_{\text{general}}$  while  $fki$  ( $i = 1, 2, \dots, K$ ) is the mean percentage of each ancestry component in each population. At least one ancestry component differed substantially in frequency compared with the general population. The isolates IF1, IF2, IF3 and IF4 have the largest difference compared with their general population ITG, while IVB has the least difference. This could be due to a more pronounced bottleneck in the history of the four IF isolates coupled with high genetic drift (Supplementary Table 6).

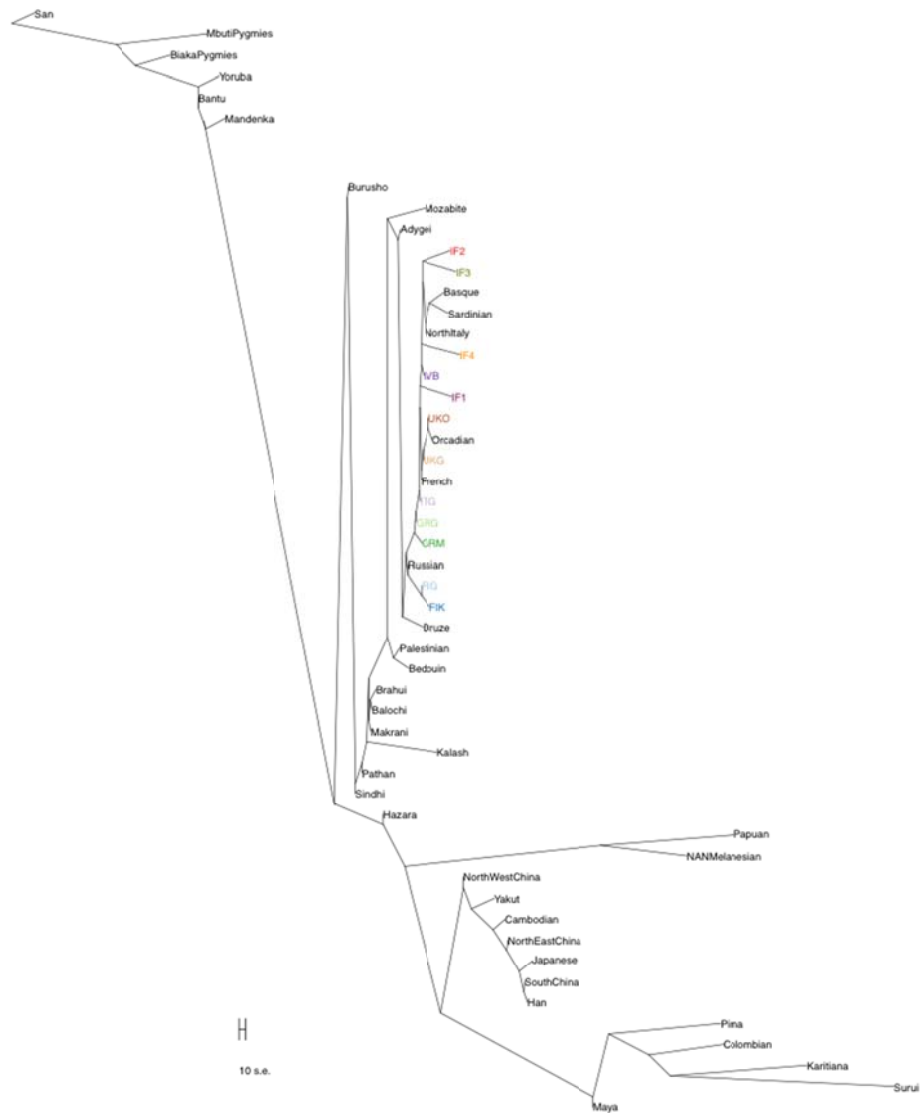

Supplementary Figure 5. Population relationships from TreeMix analysis with worldwide populations from the HGDP-CEPH panel. The analysis used the ancestry graph implemented in TreeMix v.1.12<sup>3</sup>, using blocks of 200 SNPs to account for linkage disequilibrium, excluding SNPs with MAF <0.01 across all of the samples included here. Each isolate is close to its general population, and also close to other populations from nearby geographic locations. All isolates have longer branches than the general populations, reflecting greater genetic drift. The four north Italian isolates from Friuli Venezia Giulia (IF1, IF2, IF3 and IF4) show the longest branches among all the isolated populations.

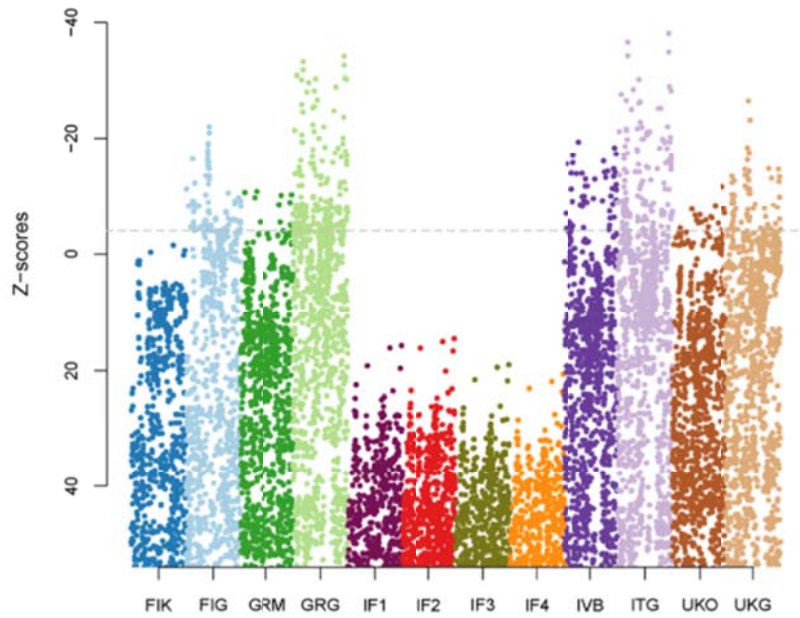

Supplementary Figure 6. Distribution of  $f_3$ -statistics for each population studied. Each dot represents the  $f_3$ -statistic population average value of a given population in this study compared with any two populations derived from the rest of the populations in this study and populations from the HGDP. We computed a Z-score using a block jackknife of 500 SNPs and used  $f_3$ -statistics (Pop1, Pop2; X) where Pop1 and Pop2 are every possible pair of populations in our dataset plus HGDP-CEPH populations, and X is one of the populations in our dataset. The grey dotted line indicates Z scores  $\leq -4$ , and scores above the line suggest admixture between two populations. The isolates appear to have had less mixture in their history compared with the general populations. No admixture was detected in the four north Italian isolates IF1, IF2, IF3 and IF4 or FIK. We detect signals of admixture in IVB and GRM, but these remain much less than in the general populations.

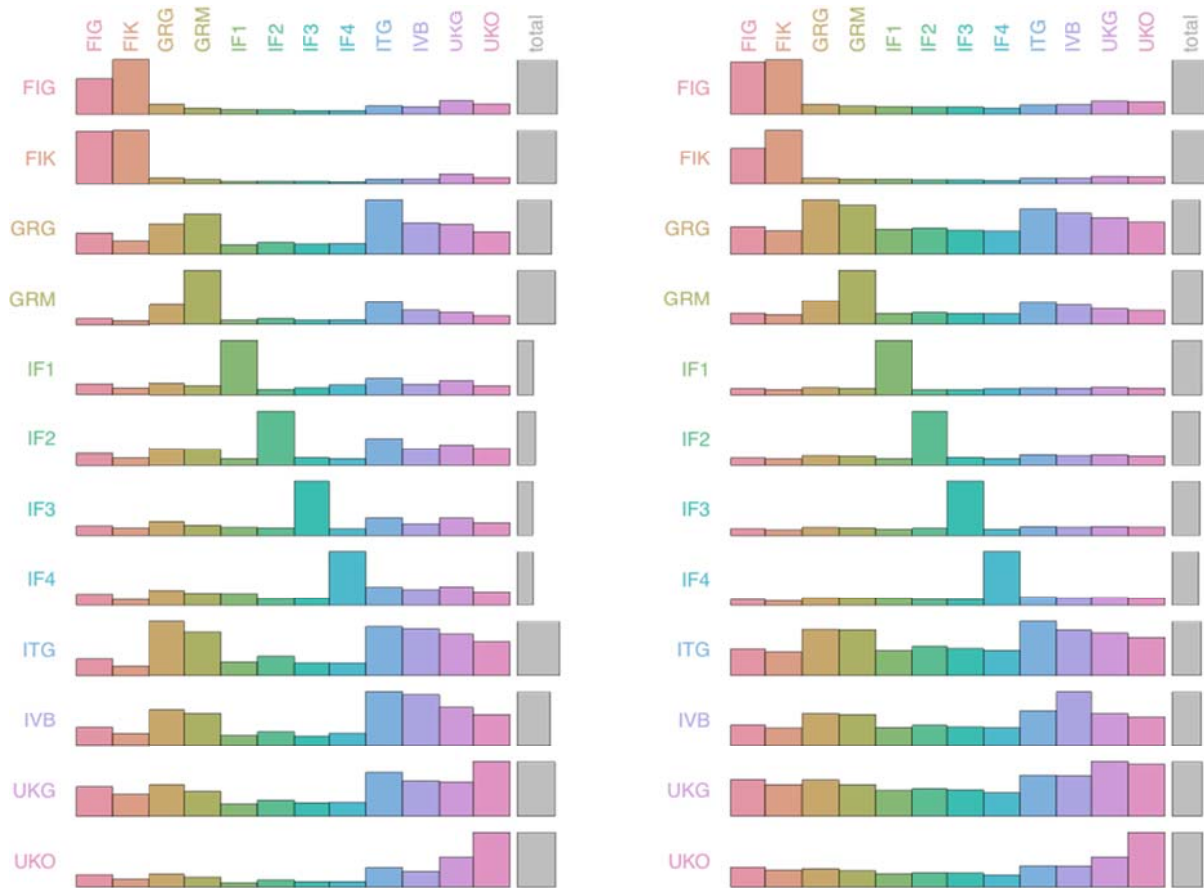

Supplementary Figure 7. Variant sharing at the population level: left,  $f_2$  sharing; right,  $f_{3-10}$  sharing. The y axis for the different color bars (except the grey one) is the proportion of the total SNPs of each row, while x axis of each grey bar is the total number of SNPs in each row. In general, each individual shared most  $f_2$  variants with others from their own population, but sharing patterns did differ between populations. Isolates from the Friuli Venezia Giulia villages (IF1, IF2, IF3 and IF4) shared very few  $f_2$  variants with either the closest general population (ITG) or other Friuli Venezia Giulia village populations, confirming that these isolates are indeed isolated and have had little recent admixture with any other population tested. FIK shared many  $f_2$  variants with its closest general population (FIG), but few with other populations, so gene flow/shared ancestry within Finland contrasted with isolation from the rest of the Europe. But IVB, UKO and GRM shared more  $f_2$  variants with both their closest general populations and the other general populations, except FIG, suggesting more extensive recent gene flow among these populations. In contrast, we see much less difference in sharing within the population and between the different populations for the  $f_{3-10}$  variants, as expected. These variants are on average older than  $f_2$  variants, and so have had more time to spread among the populations.



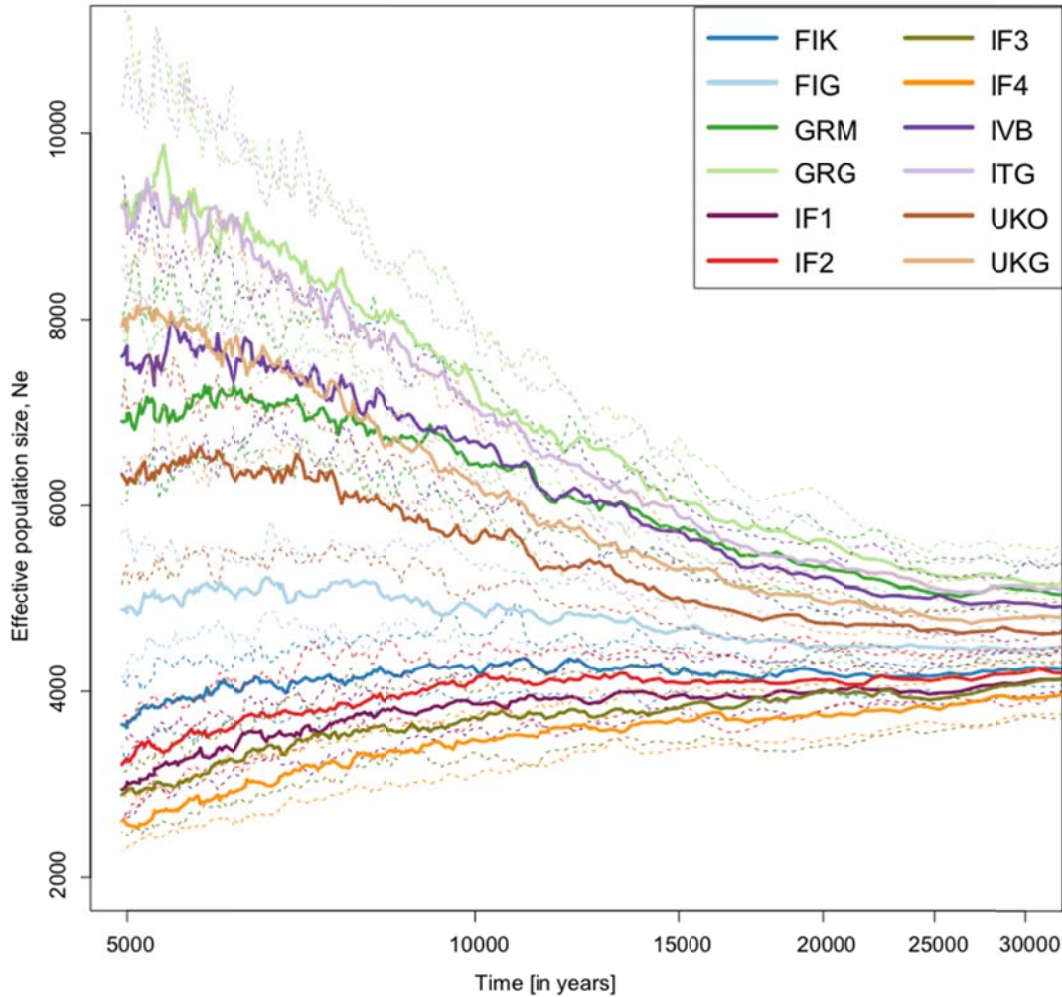

Supplementary Figure 8. LD-based demographic inference for the populations studied – long term  $N_e$  from 5,000 years ago to 30,000 thousand years ago. The x-axis shows the time in years before present. The y-axis is the average effective population size ( $N_e$ ) at a particular time. The solid lines are medians, and the dashed lines are the 95<sup>th</sup> percentiles.  $N_e$  were estimated using LD-based methods<sup>4-6</sup> in the *NeON* R package<sup>7</sup> from the minimum dataset with common variants (MAF >5%) only. The  $N_e$  is the harmonic mean over all recombination distance classes. The median and confidence interval were estimated using the 50<sup>th</sup>, 5<sup>th</sup> and 95<sup>th</sup> percentiles of the distribution of long-term  $N_e$  given the different distance classes. The  $N_e$  estimates made here are averaged over coarse time intervals (a thousand years), yet all the isolated population have a substantially smaller  $N_e$  than their closest general population up to 10,000 year ago.

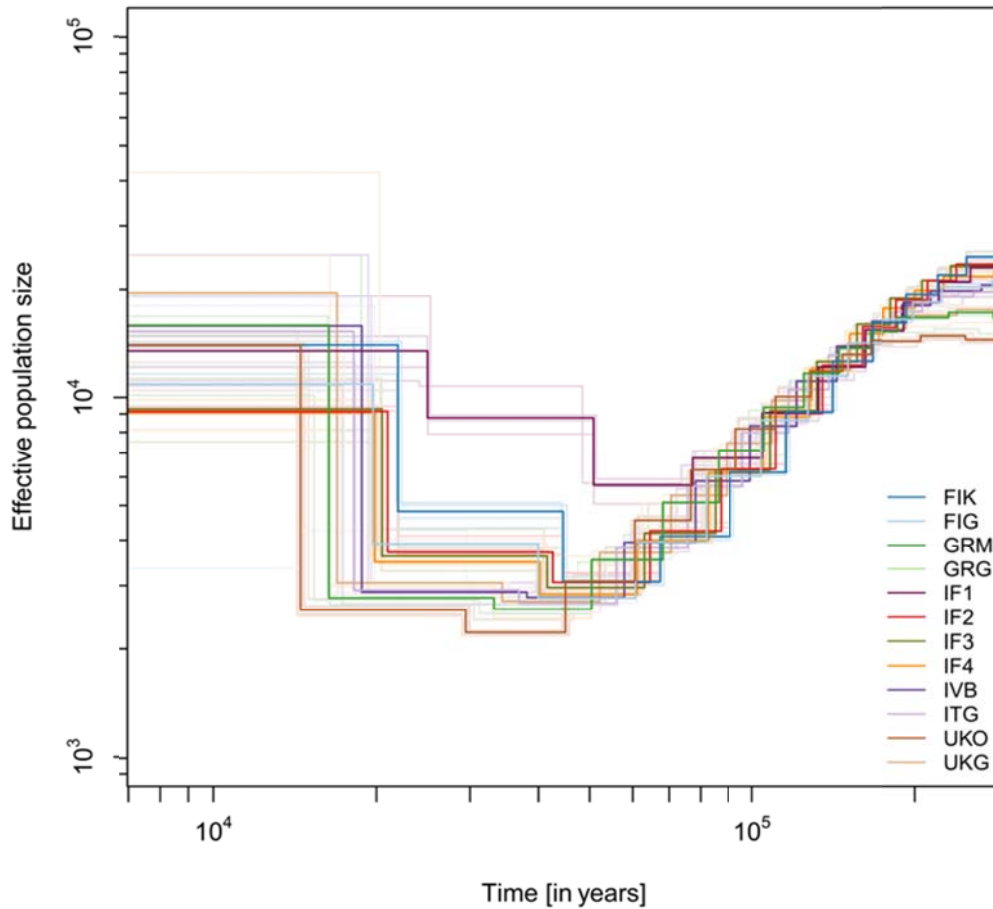

Supplementary Figure 9. Inference of effective population size history using MSMC. The Markovian coalescent (MSMC) method<sup>8</sup> was used to estimate the effective population size history of the populations using four individuals from each population. We accounted for low-coverage data by using a slow mutation rate of  $0.8 \times 10^{-8}$  mutations per nucleotide per generation and a longer generation time of 33 years, and ran MSMC on four genomes from every population using 40 time intervals, collecting the median from every time segment. The effective population sizes are the median of four individuals from each population estimated from MSMC. Most populations show the distinctive bottleneck of non-African populations with a minimum at  $\sim 60,000$  years ago. All populations except IF1 appear to have comparable sizes before 20,000 years ago and only minor differences at later times, which are not significant.

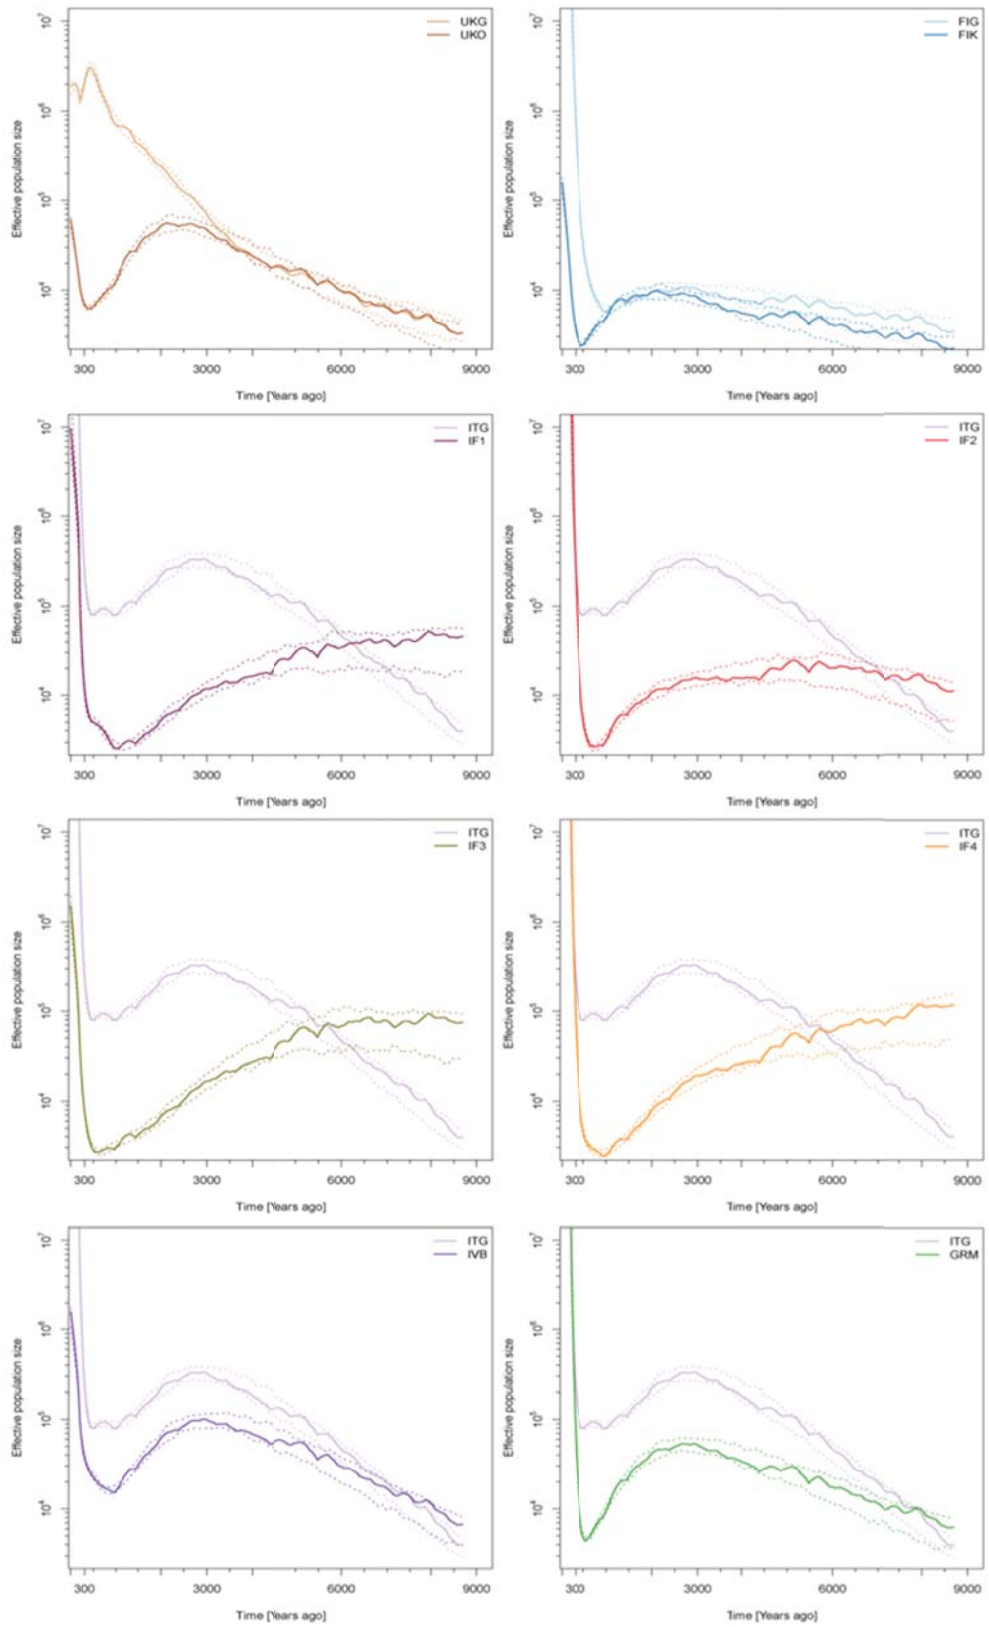

Supplementary Figure 10. Inference of recent population size changes using IBDNe. Population size estimates in recent times (within the last 9,000 years) were inferred from long segments of IBD using IBDNe. Isolated and general populations show contrasting patterns of population size changes in recent times. We used IBDNe<sup>9</sup> to estimate  $N_e$  from long segments of identity-by-descent (IBD). We used IBDseq<sup>10</sup> to detect IBD segments in sequence data from chromosome 2 in all populations. We then used IBDNe with the default parameters and a minimum IBD segment length of 2 centiMorgan (cM) units. We assumed a generation time of 29 years. In these analyses, we used ITG as the general population for GRM as the variant calling procedure for GRG made it unsuitable for this analysis. All general populations (except FIG) show a steady increase in size during the past 3,000 years, while the size of all isolates drops within the last 1000 years, and only recovers in the past few generations. IF1, IF2, IF3 and IF4 appear to have the sharpest decrease in population size while the IVB, on the other hand, show a drop in population size more limited in time and magnitude. Both FIK and FIG show a decrease in size; however, the FIG start increasing in the last 600 years while FIK start increasing only in the past 300 years. The UKO show a steady population size until 2,700 years ago when population size drops sharply and recovers only very recently. The GRG population seems to have been dropping in size gradually reaching the smallest size ~600 years ago before increasing in size in the past 300 years. All isolates appear to have decreased in size while the general populations (except FIG) have increased steadily in size.

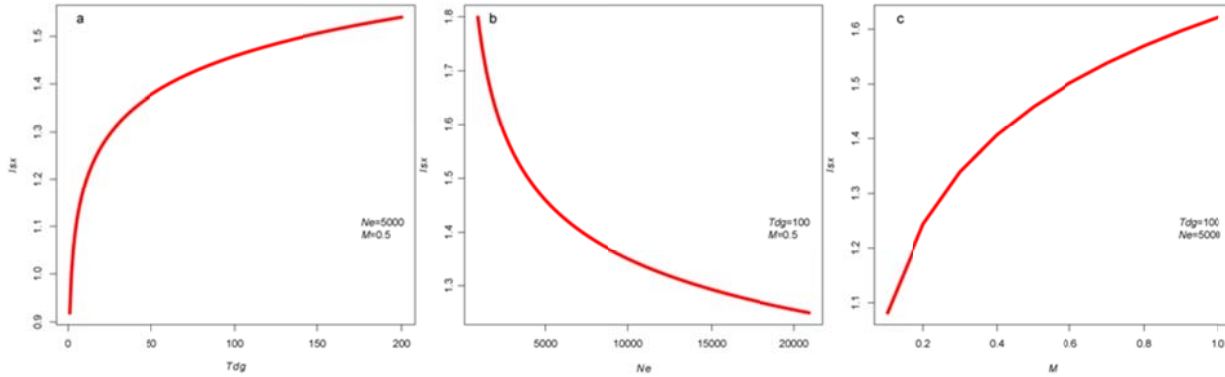

Supplementary Figure 11. The Isolation Index ( $I_{sx}$ ) reflects the demographic history of the isolated population. It increases with (a) deeper divergence time from the general population ( $T_{dg}$ ), (b) smaller effective population size ( $N_e$ ) and (c) the level of private isolate ancestry ( $M$ ) (deduced from the level of shared ancestry with the general population).

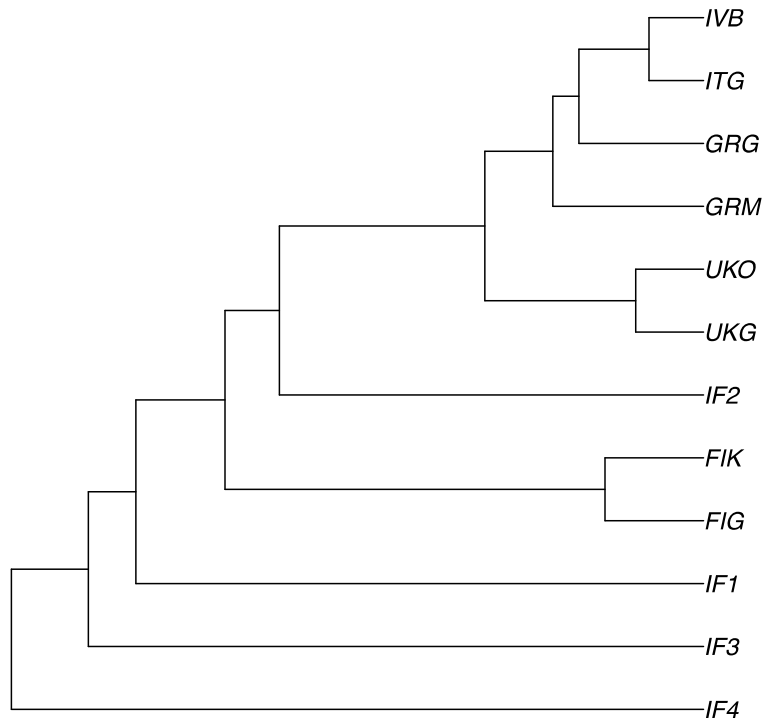

Supplementary Figure 12. UPGMA tree based on pairwise  $F_{ST}$  values between each isolate and its general population. Genome-wide  $F_{ST}$  between isolates and their general populations was calculated with the software 4P<sup>11</sup> using the minimum sample size dataset by removing markers in strong LD in the whole dataset and variants with MAF <0.01. A UPGMA tree based on pairwise  $F_{ST}$  was constructed using the R package *phangorn*<sup>12</sup>. Only IVB, FIK and UKO show a close genetic relationship with their general population, while IF1, IF2, IF3 and IF4 lie far away from their general population, which reflects the strong genetic drift in these isolates. GRM and GRG are moderately close in the tree, which might reflect intermediate divergence or calling bias.

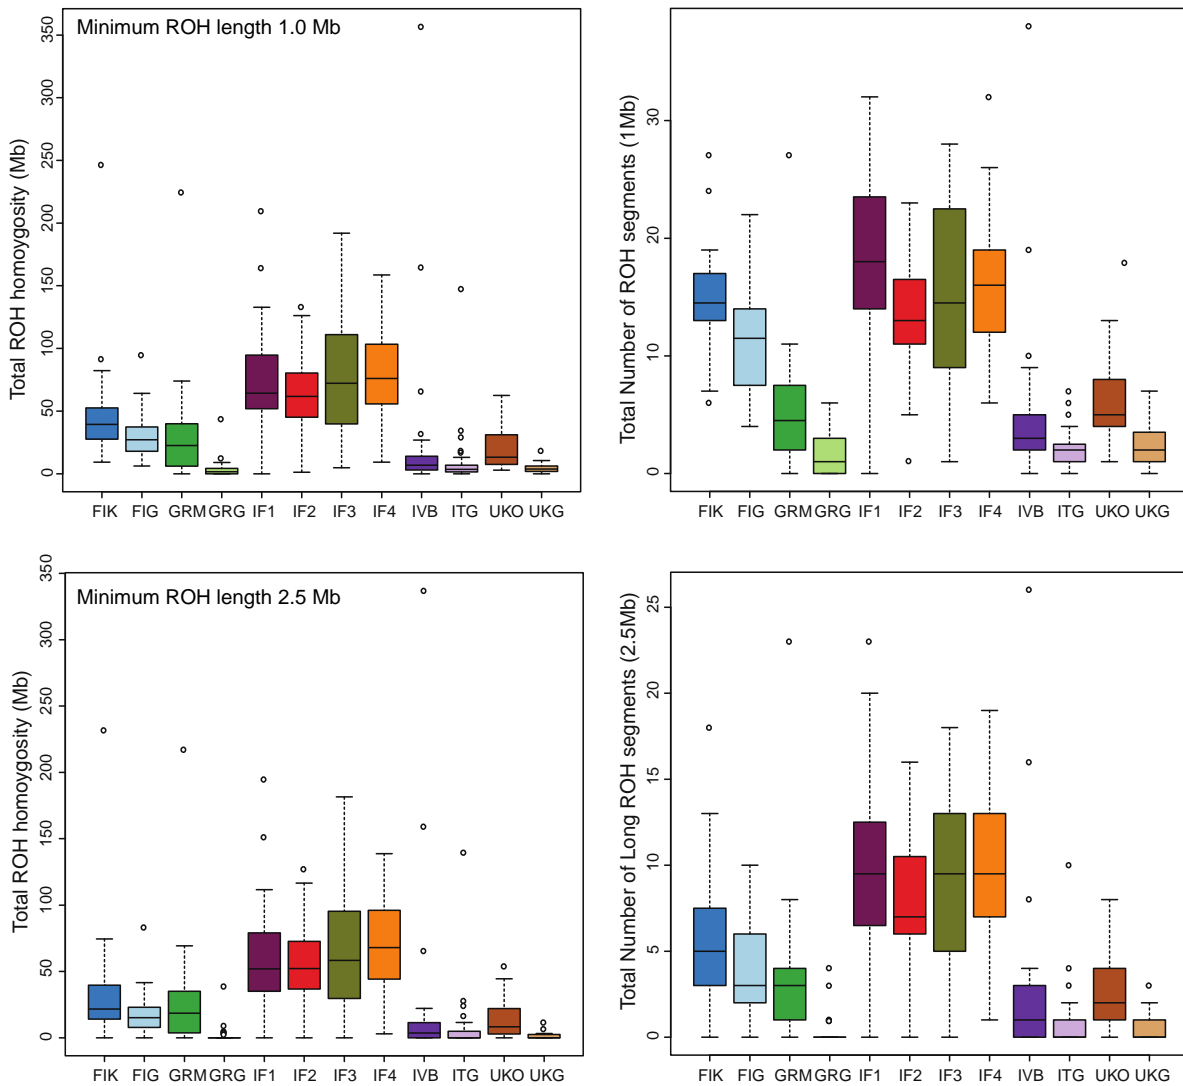

Supplementary Figure 13. Box plots of total length of ROH (left panel) and total number of ROH fragments (right panel) per individual. The top panels show ROH fragments longer than 1.0 Mb and the lower panels fragments greater than 2.5 Mb. We used the whole sample dataset but trimmed the SNPs for these analyses. The runs of homozygosity (ROHs) with a minimum length of 1.0 Mb and 2.5 Mb were calculated using PLINK<sup>13</sup> with LD pruning. More numbers of ROH fragments and total length of the ROH regions are seen in each isolate compared with its general population, both for ROH fragments greater than 1.0 Mb and 2.5 Mb. The four Italian isolates, IF1, IF2, IF3 and IF4, which are the most isolated, showed these characteristics most markedly, while IVB showed them the least, with FIK, GRM and UKO in between.

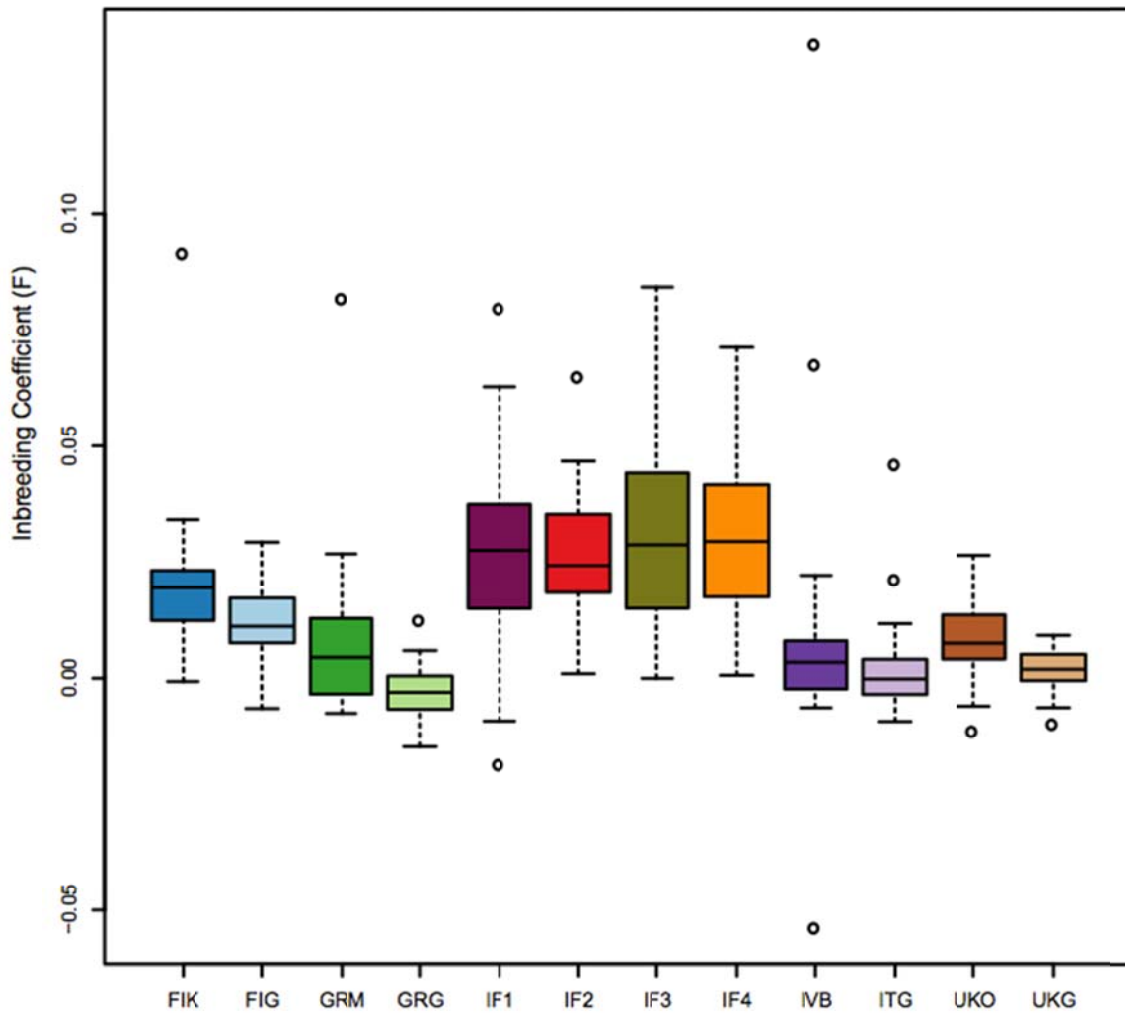

Supplementary Figure 14. Inbreeding coefficient (F) values of each individual in each population in this study. F was calculated using the LD-pruned dataset with the function `het`<sup>14</sup> implemented in PLINK. F showed a very similar pattern to ROH (Supplementary Figure 13).



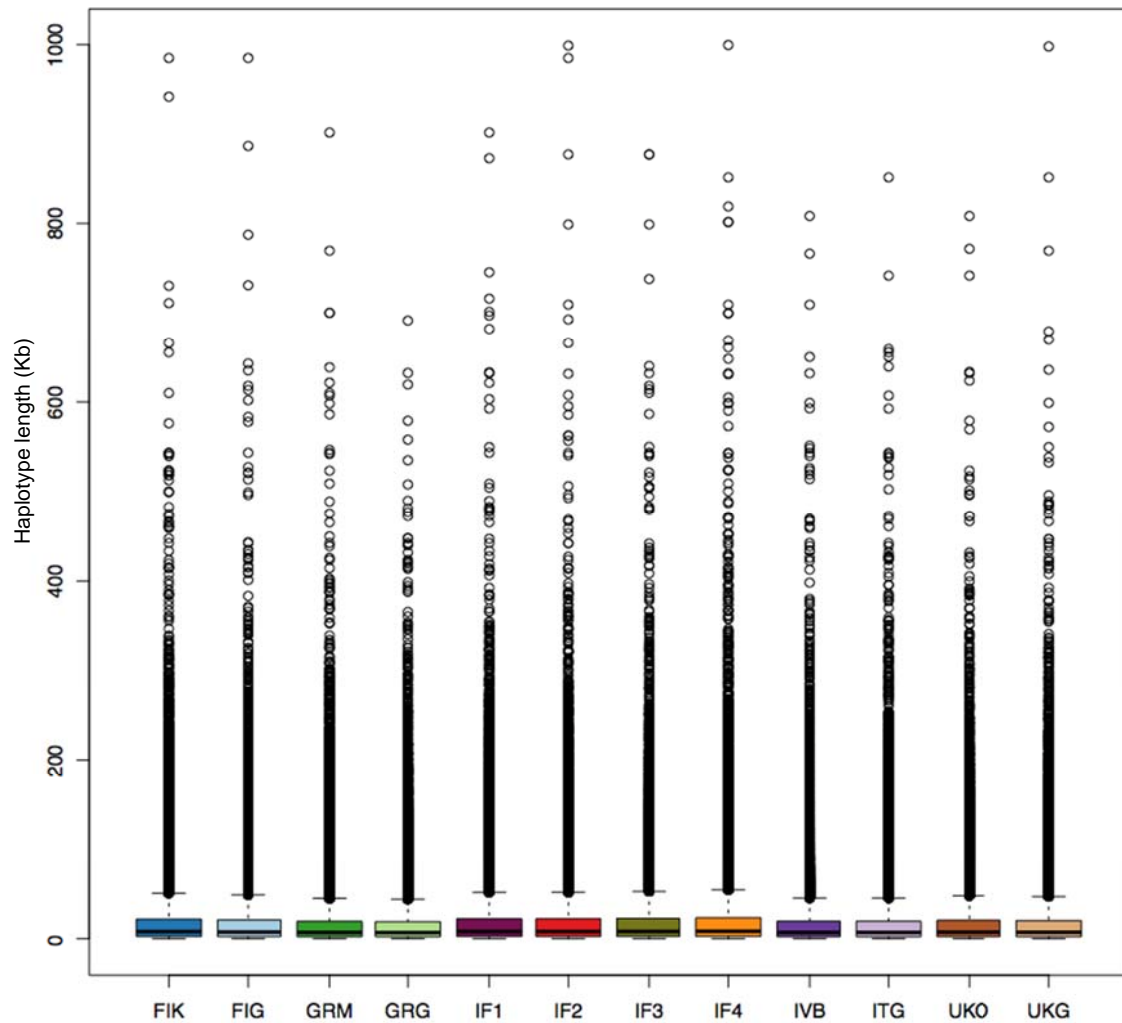

Supplementary Figure 15. Haplotype length distribution in the populations studied. The haplotype block length between variants with  $D' > 0.85$  were estimated using PLINK<sup>13</sup>, via Haploview's interpretation of block definition<sup>15</sup>, using the minimum sample size dataset for this analysis, excluding variants with MAF  $< 0.01$  across all the individuals in the dataset. The average haplotype length in the isolates IF1, IF2, IF3, IF4 and FIK is significantly longer than in their general populations ITG and FIG, but no difference was observed between GRM, IVB and UKO and their general populations GRG, ITG and UKG.

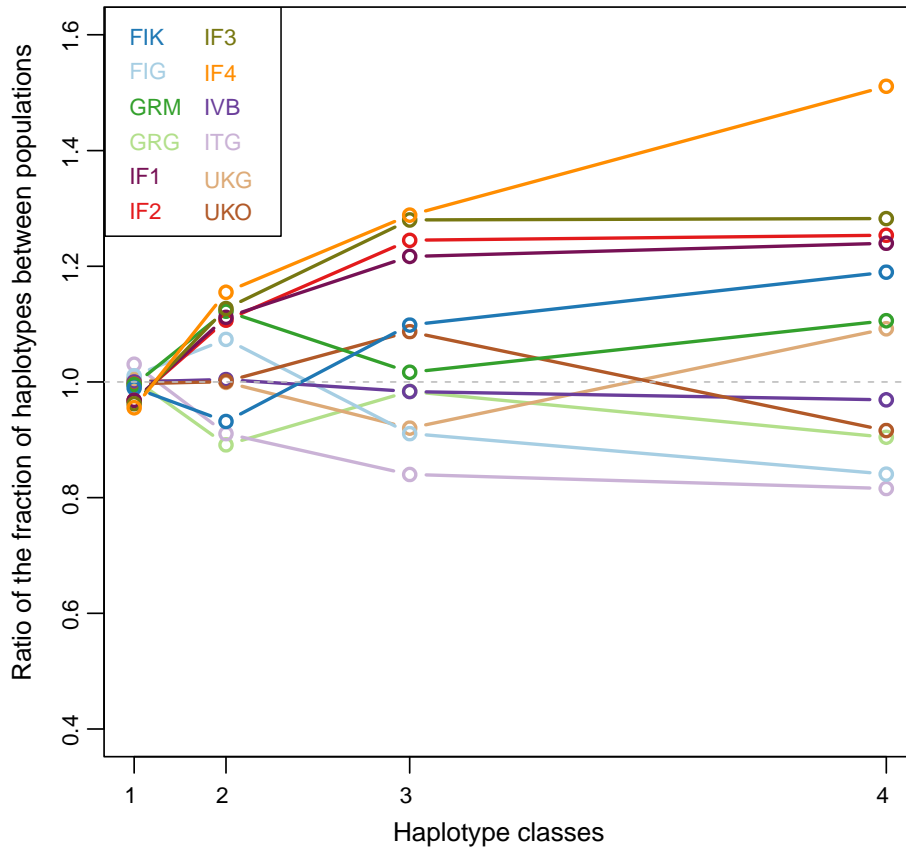

Supplementary Figure 16. The ratios in each isolate compared with its general population, or vice-versa, of haplotypes of different length classes (Supplementary Table 9) that are shared. We performed optimal k-means clustering on the distribution of the length of haplotypes using the R package Ckmeans.1d.dp<sup>16</sup> and divided the haplotypes into four classes (short, medium-short, medium-long and long) and the characteristics of each class are reported in Supplementary Table 9. The proportion of different classes of haplotypes in IF1, IF2, IF3, IF4 and FIK are also substantially different from their general populations. ITG and FIG, in particular, have a higher proportion of shorter haplotypes. No difference between GRM, IVB and UKO and their general populations GRG, ITG and UKG was found. These results again suggest that IF1, IF2, IF3, IF4 and FIK are more isolated than the other isolates.

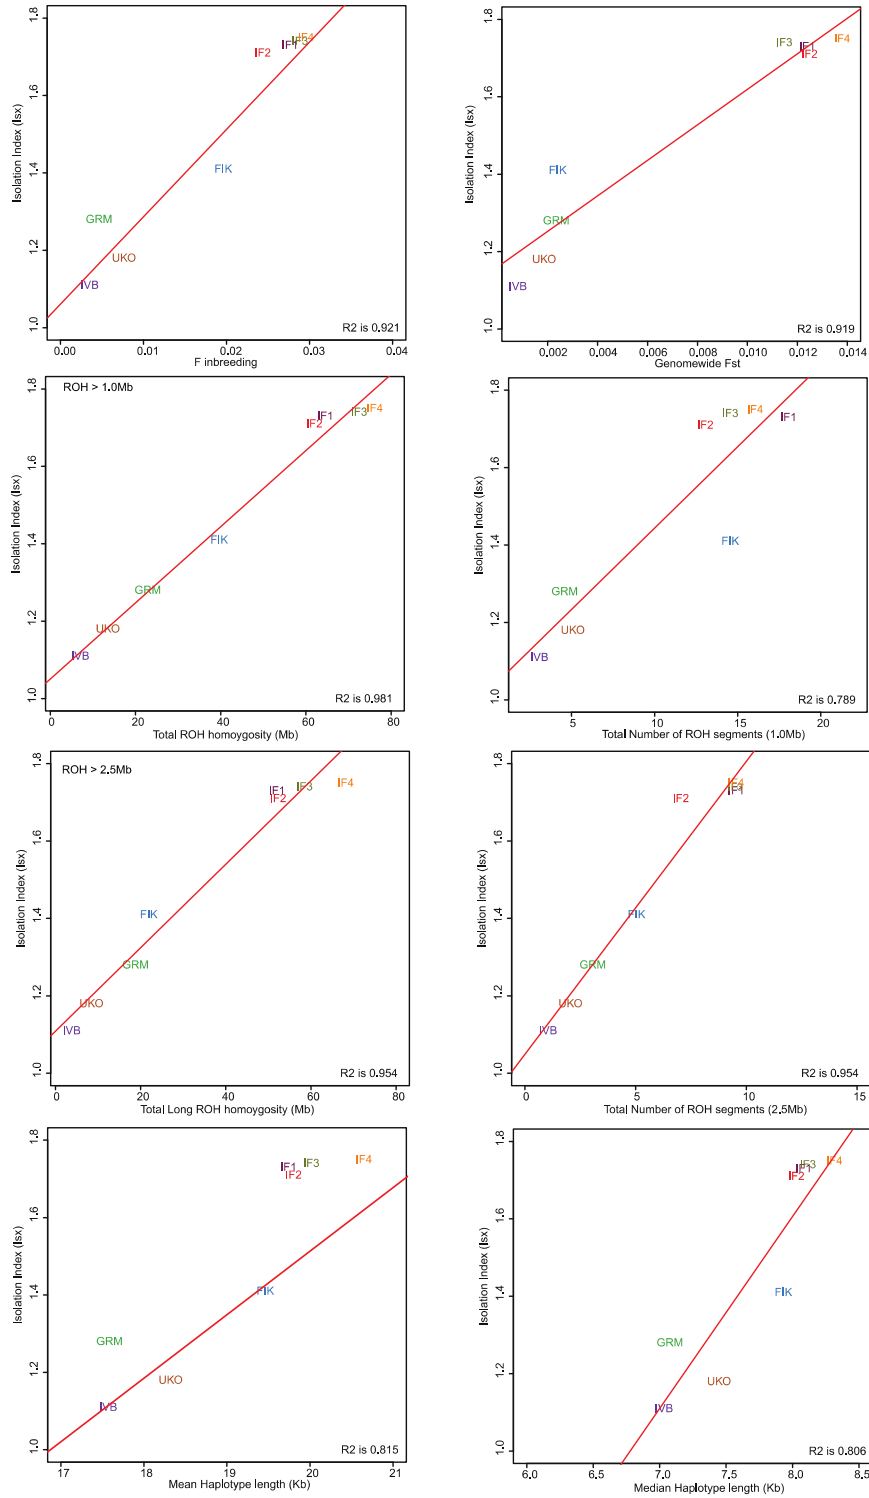

Supplementary Figure 17. Correlation plots of Isx and different measures of genetic drift. The correlation in each plot is labelled, as well as the Pearson correlation coefficient ( $R^2$ ) and its p-value.

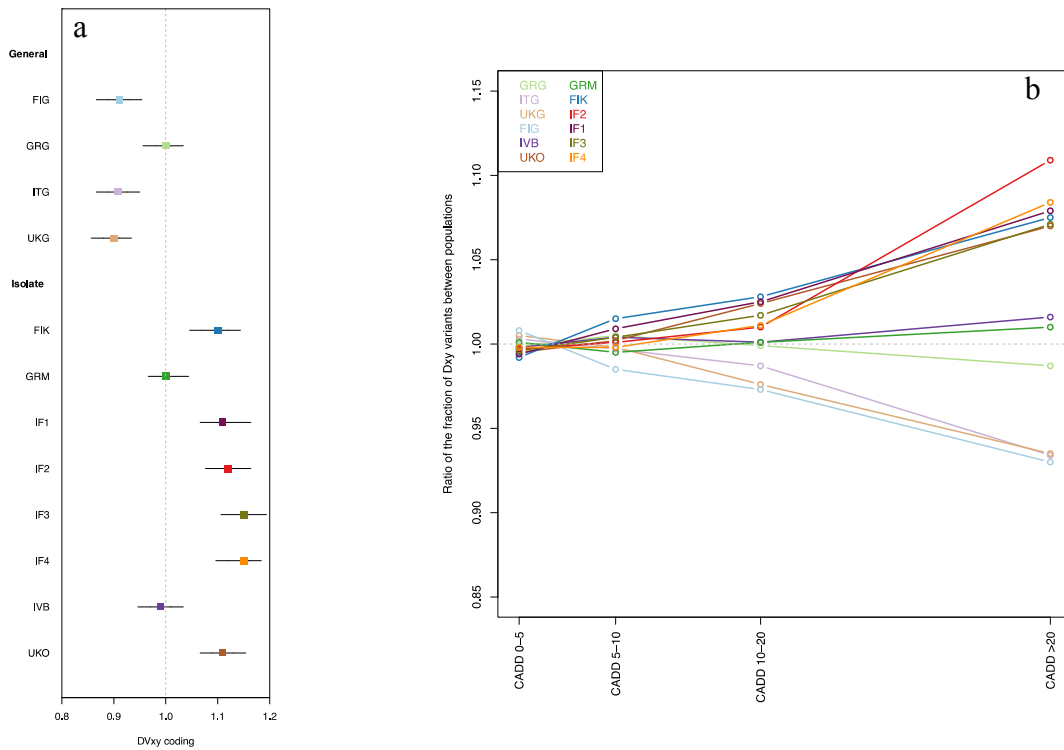

Supplementary Figure 18. *DV<sub>xy</sub>* statistics using the minimum sample size. (a) *DV<sub>xy-coding</sub>* statistic in isolates and general populations; (b) *DV<sub>xy-wg</sub>* statistics between isolates and general population in different CADD score bins.

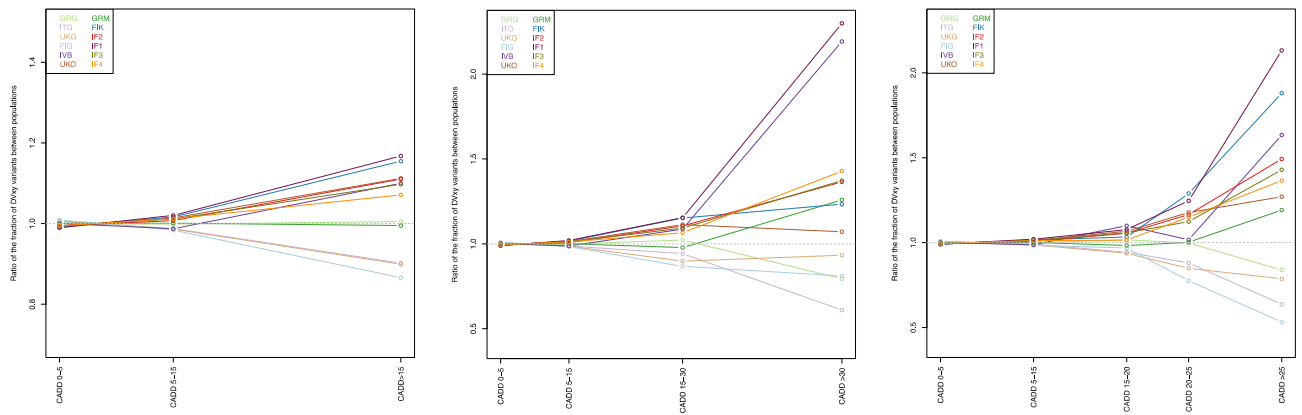

Supplementary Figure 19.  $DV_{xy-wg}$  statistics in isolates and general populations, stratified by CADD score with different cut-offs and different bins.

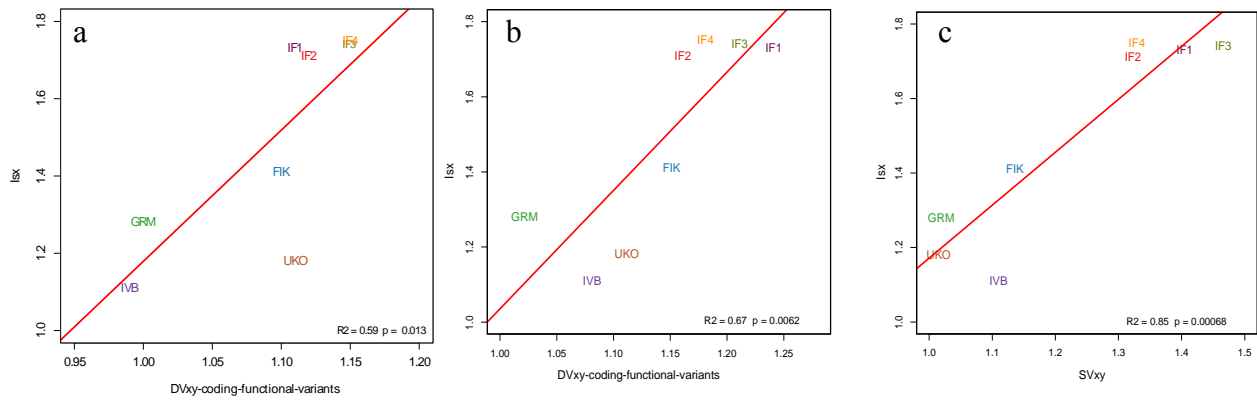

Supplementary Figure 20. Correlation between  $Isx$  and the  $DV_{xy}$  (a. with minimum sample size. b. with matched sample size) or  $SV_{xy}$  statistics (c. minimum sample size).

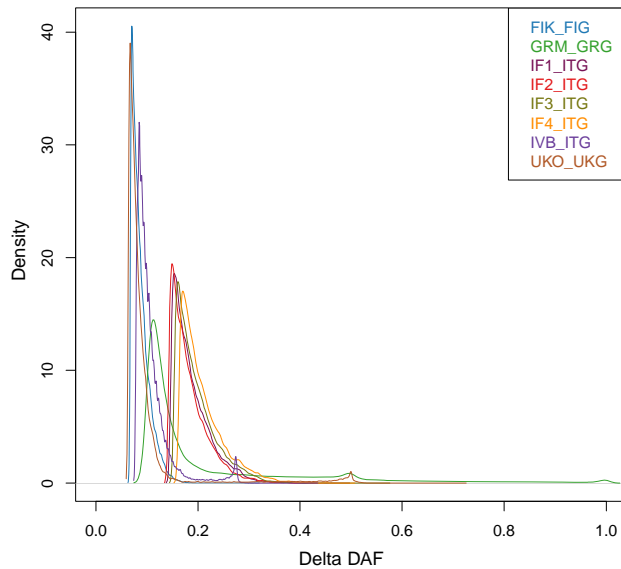

Supplementary Figure 21. 99<sup>th</sup> percentile of DAF distribution between pairs of populations. For each pair of isolate and its general population, genome-wide pairwise derived allele frequency differences (deltaDAF) were calculated as described previously<sup>17</sup>. The sites with extreme deltaDAF due to high DAF values in the isolate (HighD sites) were identified by scanning the genome in non-overlapping windows of 3,000 SNPs and picking the variant within each window with the highest deltaDAF value, provided that deltaDAF was above a threshold between 0.3 and 0.5. HighD sites were assigned to the population with the highest DAF in the pair.

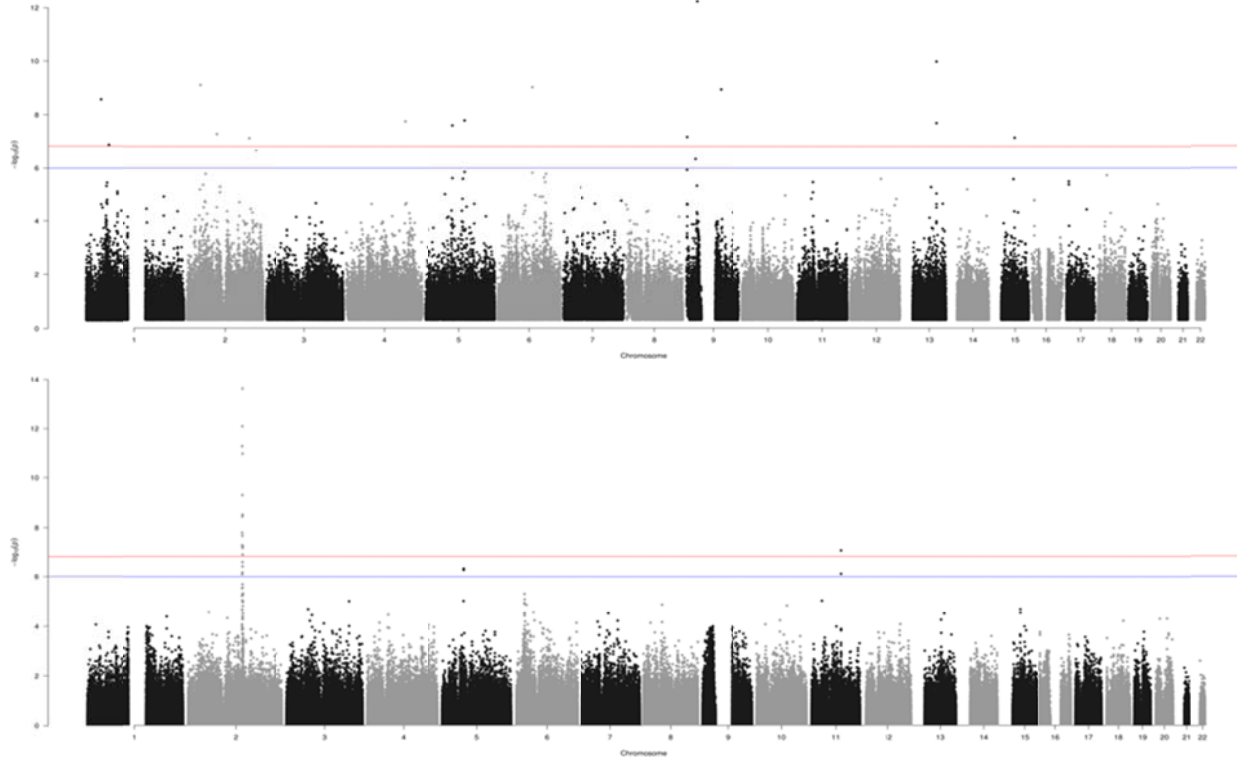

Supplementary Figure 22. Scaled SDS values in UKO (top) and UKG (bottom). The red line represents the 99.99<sup>th</sup> percentile of the distribution while the blue line genome-wide suggested significant p value. The singleton density score (SDS) analyses were performed as described<sup>18</sup> to one of our isolates (UKO with sample size of 397) and its general population (UKG, the UK10K data, also used in the SDS paper). We successfully replicated the selection signal at the lactose locus in the UKG, and the known selected SNP, rs4988235, is in the 99.99<sup>th</sup> percentile of the distribution. However, we failed to detect any signal at this locus in the UKO. This suggested that the sample size of UKO is too small for SDS to have power to detect even strong signals. We failed to detect any convincing extra selection signal genomewide in UKO. There are a few SNP signals with high SDS scores, but they are not clustered, and are likely false positives. As UKO has the biggest sample size and second lowest  $I_{sx}$  value of our isolates, this suggests that we would not be able to detect any convincing positive selection signals in any of the other isolates studied here.



## Supplementary Tables

Supplementary Table 1. Population and dataset information

| Population (three letter name) | Sample location               | Sample size | Sequence depth | Data published    |
|--------------------------------|-------------------------------|-------------|----------------|-------------------|
| Kuusamo (FIK)                  | Kuusamo, Finland              | 377         | 4x             | No                |
| SISu cohort (FIG)              | Suomi, Finland                | 1564        | 6x             | No                |
| HELIC-MANOLIS (GRM)            | Crete, Greece                 | 249         | 4x             | No                |
| TEENAGE (GRG)                  | Athens, Greece                | 100         | 10-30x         | No                |
| Friuli Venezia Giulia (all)    | Friuli Venezia Giulia, Italy  | 250         | 4-10x          | No                |
| Friuli Venezia Giulia 1 (IF1)  | Friuli Venezia Giulia, Italy  | 60          | 4-10x          | No                |
| Friuli Venezia Giulia 2 (IF2)  | Friuli Venezia Giulia, Italy  | 45          | 4-10x          | No                |
| Friuli Venezia Giulia 3 (IF3)  | Friuli Venezia Giulia, Italy  | 47          | 4-10x          | No                |
| Friuli Venezia Giulia 4 (IF4)  | Friuli Venezia Giulia, Italy  | 36          | 4-10x          | No                |
| Val Borbera (IVB)              | Val Borbera, Italy            | 225         | 6x             | No                |
| Toscani (ITG)                  | Toscani, Italy                | 108         | 7x             | Yes <sup>19</sup> |
| Orkney (UKO)                   | Scotland, UK                  | 397         | 4x             | No                |
| UK10K (UKG)                    | UK (ALSPAC & TwinsUK cohorts) | 3781        | 6.5x           | Yes <sup>20</sup> |

All of the populations have been given a three-letter abbreviation used throughout the text. The first one or two letters identify the country (FI = Finland, GR = Greece, I = Italy, UK = United Kingdom) and the last one or two letters the specific isolate (K = Kuusamo, M = MANOLIS, F = Friuli Venezia Giulia, VB = Val Borbera and O = Orkney) or the general population (G).

Samples from Friuli Venezia Giulia were collected from four different villages and were found to be genetically highly structured, so we treated them as four different isolates, and we also excluded some samples which do not genetically match any of these four groups.

Supplementary Table 2. Genotype discordance with genotype chip data, stratified by SNP class.

|              | REF-REF | REF-ALT | ALT-ALT |
|--------------|---------|---------|---------|
| 1000 Genomes | 1.21%   | 0.11%   | 1.06%   |
| Finland      | 0.11%   | 0.37%   | 0.30%   |
| UK10K        | 0.10%   | 0.32%   | 0.27%   |

Supplementary Table 3. Numbers of variants in the different populations stratified by functional category. The functional annotation used the Ensembl 76 VEP pipeline with “-pick” option. ‘Novel’ variants are those not found in 1000 Genomes Project Phase 3 or UK10K project, and the proportion of novel variants is shown in brackets.

The numbers and proportions of rare variants (MAF  $\leq 2\%$ ) in each population that are novel are very different, as expected because of the different sample sizes. In contrast, they are not very different for both variants with MAF  $>2-\leq 5\%$  and common variants ( $>5\%$ ). It is striking that we still found ~10-20 thousand novel variants with MAF  $>2-\leq 5\%$  and 40-50 thousand novel common (MAF  $>5\%$ ) variants even after a comparison with the 1000 Genomes Project Phase 3 and UK10K project. The counts for different functional categories show the same pattern but the proportions of novel rare variants in important functional categories, such as predicted LoF and non-synonymous, are significantly higher than the other variants due to the strength of purifying selection. In total, 4551, 1206 and 1409 unique predicted LoF variants and 94,221, 26,838 and 29,121 non-synonymous variants are found in the MAF bins of  $\leq 2\%$ ,  $>2-\leq 5\%$ , and  $>5\%$  among the 10 newly-sequenced populations here: 23.0%, 1.0% and 0.6% for predicted LoFs and 17.9%, 1.2% and 0.6% for non-synonymous were novel. In all, we find more than 1.4 thousand novel common predicted LoF variants and more than 29 thousand novel non-synonymous ones.

| POP   | predicted LoF  |              | Nonsynon       |               | Synon          |              | UTR            |              | Intron         |                | Regulatory     |               | Intergenic     |              |             |              |               |               |              |             |             |
|-------|----------------|--------------|----------------|---------------|----------------|--------------|----------------|--------------|----------------|----------------|----------------|---------------|----------------|--------------|-------------|--------------|---------------|---------------|--------------|-------------|-------------|
|       | MAF $\leq 2\%$ | MAF $>2-5\%$ | MAF $\leq 2\%$ | MAF $>2-5\%$  | MAF $\leq 2\%$ | MAF $>2-5\%$ | MAF $\leq 2\%$ | MAF $>2-5\%$ | MAF $\leq 2\%$ | MAF $>2-5\%$   | MAF $\leq 2\%$ | MAF $>2-5\%$  | MAF $\leq 2\%$ | MAF $>2-5\%$ |             |              |               |               |              |             |             |
| FIG   | 2.1k (19.9%)   | 311 (1.0%)   | 967 (0.8%)     | 43.6k (15.8%) | 6.9k (0.8%)    | 19.5k (0.9%) | 27.9k (12.3%)  | 5.7k (0.7%)  | 20.2k (0.9%)   | 108.2k (12.6%) | 22.5k (0.9%)   | 76.9k (0.8%)  | 3.4m (11.9%)   | 77.7k (0.8%) | 3.0m (0.7%) | 634k (12.4%) | 142k (1.0%)   | 542k (0.8%)   | 2.4m (11.6%) | 580k (0.8%) | 2.3m (0.7%) |
| FK    | 1.3k (18.8%)   | 306 (2.0%)   | 971 (0.9%)     | 25.6k (14.6%) | 7.0k (1.6%)    | 19.6k (0.8%) | 17.0k (10.8%)  | 5.7k (1.2%)  | 20.1k (0.8%)   | 65.8k (11.7%)  | 22.7k (1.4%)   | 76.6k (0.8%)  | 2.1m (11.0%)   | 788k (1.2%)  | 3.0m (0.7%) | 389k (11.0%) | 144k (1.3%)   | 539k (0.8%)   | 1.5m (10.7%) | 581k (1.1%) | 2.3m (0.7%) |
| GNG   | 917 (2.0%)     | 235 (0.4%)   | 950 (0.7%)     | 21.0k (2.1%)  | 5.4 (0.8%)     | 18.5k (0.8%) | 15.6k (1.8%)   | 4.9k (0.9%)  | 19.5k (0.8%)   | 60.2k (1.7%)   | 18.9k (0.7%)   | 74.5k (0.8%)  | 1.9m (1.6%)    | 667k (0.7%)  | 3.0m (0.7%) | 357k (1.7%)  | 122k (0.7%)   | 524k (0.8%)   | 1.4m (1.5%)  | 500k (0.7%) | 2.3m (0.7%) |
| GRM   | 1.3k (9.5%)    | 256 (1.6%)   | 992 (1.0%)     | 3.0k (9.6%)   | 6.1k (1.5%)    | 19.6k (1.0%) | 21.1k (7.1%)   | 5.4k (1.3%)  | 20.3k (0.9%)   | 81.3k (7.5%)   | 20.5k (1.2%)   | 77.5k (0.8%)  | 2.6m (7.3%)    | 728k (1.2%)  | 3.0m (0.8%) | 490k (7.6%)  | 133k (1.2%)   | 547k (0.9%)   | 1.9m (7.2%)  | 549k (1.1%) | 2.4m (0.8%) |
| FI    | 365 (0.8%)     | 288 (1.8%)   | 971 (1.0%)     | 7.6k (2.0%)   | 6.3k (2.3%)    | 19.3k (1.0%) | 5.7k (1.6%)    | 5.3k (1.4%)  | 19.6 (1.0%)    | 22.1k (1.6%)   | 20.6k (1.4%)   | 75.2k (0.9%)  | 742k (1.4%)    | 720k (1.3%)  | 2.9m (0.8%) | 137k (1.4%)  | 131k (1.3%)   | 527k (0.9%)   | 540 (1.3%)   | 535k (1.2%) | 2.3m (0.8%) |
| IF2   | 250 (2.3%)     | 319 (0.9%)   | 974 (0.6%)     | 5.6k (1.8%)   | 7.2 (1.5%)     | 19.5k (0.9%) | 4.2k (1.4%)    | 5.7k (1.1%)  | 20.0k (1.0%)   | 16.5k (1.3%)   | 22.2k (1.2%)   | 76.7k (0.8%)  | 543k (1.3%)    | 790k (1.0%)  | 3.0m (0.8%) | 100k (1.4%)  | 143k (1.1%)   | 538k (0.8%)   | 393k (1.2%)  | 578k (1.0%) | 2.3m (0.7%) |
| IF3   | 244 (2.0%)     | 300 (0.3%)   | 995 (0.9%)     | 5.1k (1.8%)   | 6.7k (1.8%)    | 20.0k (1.0%) | 3.8 (1.5%)     | 5.3k (1.6%)  | 20.5k (0.9%)   | 14.7k (1.5%)   | 21.1k (1.2%)   | 78.0k (0.9%)  | 491k (1.3%)    | 755k (1.1%)  | 3.0m (0.8%) | 90.5k (1.3%) | 135k (1.2%)   | 545k (0.9%)   | 353k (1.2%)  | 546k (1.0%) | 2.4m (0.7%) |
| IF4   | 227 (0.4%)     | 238 (0.4%)   | 977 (1.2%)     | 5.2k (2.1%)   | 5.1k (1.6%)    | 19.7k (1.1%) | 4.0k (1.5%)    | 4.2k (1.1%)  | 20.1k (1.0%)   | 15.8k (1.5%)   | 16.2k (1.3%)   | 76.9k (0.9%)  | 526k (1.3%)    | 569k (1.1%)  | 3.0m (0.8%) | 97.8k (1.4%) | 105k (1.1%)   | 538k (0.9%)   | 381k (1.2%)  | 419k (1.0%) | 2.3m (0.8%) |
| N/B   | 1.2k (2.1%)    | 259 (0.0%)   | 999 (1.2%)     | 28.1k (2.3%)  | 6.0k (1.1%)    | 19.6k (0.9%) | 20.0k (2.0%)   | 5.2k (0.8%)  | 20.3k (0.9%)   | 77.6k (1.8%)   | 19.6k (0.8%)   | 77.2k (0.8%)  | 2.5m (1.7%)    | 703k (0.8%)  | 3.0m (0.8%) | 462k (1.3%)  | 128k (0.8%)   | 548k (0.9%)   | 1.8m (1.6%)  | 527k (0.8%) | 2.4m (0.8%) |
| UKO   | 1.9k (21.7%)   | 288 (0.4%)   | 981 (1.2%)     | 39.3 (16.0%)  | 6.4k (0.9%)    | 19.5k (1.0%) | 25.1k (12.3%)  | 5.3k (0.7%)  | 20.2k (0.9%)   | 99.0k (12.9%)  | 21.2k (0.8%)   | 76.6k (0.8%)  | 3.1m (11.9%)   | 748k (0.8%)  | 3.0m (0.8%) | 573k (12.0%) | 136k (0.8%)   | 541k (0.9%)   | 2.2m (11.4%) | 550k (0.7%) | 2.3m (0.8%) |
| Total | 4.6k (23.0%)   | 1.2k (1.0%)  | 1.4k (0.6%)    | 94.2k (17.9%) | 26.8k (1.2%)   | 29.1k (0.6%) | 60.8k (13.5%)  | 21.6k (0.8%) | 28.0k (0.4%)   | 226.1k (14.3%) | 83.9k (0.7%)   | 107.0k (0.3%) | 7.3m (13.8%)   | 2.9m (0.7%)  | 4.0m (0.3%) | 1.4m (13.5%) | 530.7k (0.8%) | 732.8k (0.4%) | 5.2m (13.3%) | 2.1m (0.7%) | 3.1m (0.3%) |

Supplementary Table 4. Numbers and proportions (percentage) of deleterious variants that have drifted to high frequency in the isolates compared with all four general populations studied here

| <b>Isolates</b> | <b>Total</b> | <b>Missense plus LoF</b> | <b>CADD score 15</b> |
|-----------------|--------------|--------------------------|----------------------|
| <b>FIK</b>      | 70,579       | 410 (0.58%)              | 1479 (2.1%)          |
| <b>GRM</b>      | 49,884       | 266 (0.53%)              | 988 (2.0%)           |
| <b>IF1</b>      | 119,157      | 689 (0.58%)              | 2676 (2.2%)          |
| <b>IF2</b>      | 94,496       | 518 (0.55%)              | 2080 (2.2%)          |
| <b>IF3</b>      | 107,281      | 616 (0.57%)              | 2417 (2.3%)          |
| <b>IF4</b>      | 122,254      | 688 (0.56%)              | 2792 (2.3%)          |
| <b>IVB</b>      | 30,284       | 154 (0.51%)              | 530 (1.8%)           |
| <b>UKO</b>      | 36,512       | 210 (0.58%)              | 634 (1.7%)           |

Supplementary Table 5. Median numbers of variant sites, homozygous sites, heterozygous sites and alleles per genome. The functional annotation used Ensembl 76 VEP pipeline with the “-pick” option. Numbers to the left-hand side of the grey line are based on the minimum-sample-size and those on the right-hand side are based on matched-sample-size. hom = homozygous, het = heterozygous.



Supplementary Table 6. FK<sub>i</sub> statistics.

| <b>Population</b> | <b>Median (FK<sub>i</sub>)</b> | <b>Maximum (FK<sub>i</sub>)</b> |
|-------------------|--------------------------------|---------------------------------|
| FIK/FIG           | -0.014                         | 0.618                           |
| GRM/GRG           | -0.025                         | 0.256                           |
| IF1/ITG           | -0.045                         | 0.882                           |
| IF2/ITG           | -0.036                         | 0.804                           |
| IF3/ITG           | -0.041                         | 0.851                           |
| IF4/ITG           | -0.031                         | 0.834                           |
| IVB/ITG           | -0.003                         | 0.026                           |
| UKO/UKG           | -0.023                         | 0.252                           |

FK<sub>i</sub> median and maximum values for each isolate compared with its general population, using K=8 in the ADMIXTRUE analysis

Supplementary Table 7. Divergence time of each isolate from its closest general population estimated using the LD-based method.

| Isolate | Time of divergence from the closest general population (generations) | CI (5 <sup>th</sup> - 95 <sup>th</sup> percentile) |
|---------|----------------------------------------------------------------------|----------------------------------------------------|
| FIK     | 26                                                                   | 25-28                                              |
| GRM     | 40                                                                   | 38-44                                              |
| IF1     | 154                                                                  | 144-164                                            |
| IF2     | 137                                                                  | 127-146                                            |
| IF3     | 159                                                                  | 148-170                                            |
| IF4     | 176                                                                  | 166-188                                            |
| IVB     | 18                                                                   | 17-19                                              |
| UKO     | 21                                                                   | 18-22                                              |

The divergence times estimated from LD have large uncertainties, but we see that FIK, GRM and IVB diverged from their closest general population more recently than the four north Italian isolates, IF1, IF2, IF3 and IF4. In particular, the divergence time of FIK from FIG around 26 generations ago (750 years) fits the historical divergence time of mid-16<sup>th</sup> century.

Supplementary Table 8. Demographic parameters and  $Isx$  values for each isolate

| Isolated population | $Tdg$ in generations<br>(5-95 <sup>th</sup> percentile) | $M$  | Long-term $Ne$<br>(5-95 <sup>th</sup> percentile) | $Isx$<br>(5-95 <sup>th</sup> percentile) |
|---------------------|---------------------------------------------------------|------|---------------------------------------------------|------------------------------------------|
| FIK                 | 26 (25-28)                                              | 0.71 | 4226 (3972-4399)                                  | 1.41(1.39-1.42)                          |
| GRM                 | 40 (38-44)                                              | 0.42 | 6242 (6011-6907)                                  | 1.28 (1.25-1.30)                         |
| IF1                 | 154 (144-164)                                           | 0.99 | 3806 (3529-4075)                                  | 1.73 (1.70-1.75)                         |
| IF2                 | 137 (127-146)                                           | 0.99 | 3960 (3595-4271)                                  | 1.71(1.68-1.73)                          |
| IF3                 | 159 (148-170)                                           | 0.99 | 3656 (3289-3939)                                  | 1.74 (1.71-1.77)                         |
| IF4                 | 176 (166-188)                                           | 0.91 | 3390 (3158-3634)                                  | 1.75 (1.72-1.77)                         |
| IVB                 | 18 (17-19)                                              | 0.31 | 6439 (5955-6711)                                  | 1.11 (1.09-1.12)                         |
| UKO                 | 21(18-22)                                               | 0.37 | 5592 (5248-5990)                                  | 1.18 (1.15-1.20)                         |

As each isolate has a different demographic history, isolation levels are different. IF1, IF2, IF3 and IF4 are the most isolated populations with the highest  $Isx$  values, while IVB is the least isolated one with the lowest  $Isx$ . The highest  $Isx$  values reflect a combination of smaller  $Ne$ , longer isolation time and lower migration between the isolate and its general population.



Supplementary Table 9. Characteristics of each haplotype class.

| <b>Class</b> | <b>Description</b> | <b>Mean (kb)</b> | <b>Standard Deviation (kb)</b> |
|--------------|--------------------|------------------|--------------------------------|
| 1            | short              | 7.1              | 6.6                            |
| 2            | medium-short       | 44.1             | 14.8                           |
| 3            | medium-long        | 118.9            | 32.3                           |
| 4            | long               | 310.2            | 116.2                          |

Supplementary Table 10. Summary of haplotype features in the populations studied.

| Population | Total N. haplotype | Mean length (kb) | Mann-Whitney p-value | Median (kb) | 5 <sup>th</sup> -95 <sup>th</sup> percentile (kb) | Fraction of class 1 haplotype | Fraction of class 2 haplotype | Fraction of class 3 haplotype | Fraction of class 4 haplotype |
|------------|--------------------|------------------|----------------------|-------------|---------------------------------------------------|-------------------------------|-------------------------------|-------------------------------|-------------------------------|
| FIK        | 49,693             | 19.45            | < 0.0001             | 7.92        | 0.33-75.81                                        | 0.7826                        | 0.1579                        | 0.0390                        | 0.0048                        |
| FIG        | 49,643             | 18.57            | n.a.                 | 7.51        | 0.30-72.16                                        | 0.7910                        | 0.1696                        | 0.0355                        | 0.0040                        |
| GRM        | 48,771             | 17.61            | 0.009117             | 7.07        | 0.31-68.62                                        | 0.8054                        | 0.1736                        | 0.0331                        | 0.0036                        |
| GRG        | 48,661             | 17.12            | n.a                  | 6.83        | 0.29-67.83                                        | 0.8095                        | 0.1547                        | 0.0325                        | 0.0032                        |
| IF1        | 49,986             | 19.73            | < 0.0001             | 8.07        | 0.34-77.26                                        | 0.7790                        | 0.1764                        | 0.0399                        | 0.0047                        |
| IF2        | 49,851             | 19.79            | < 0.0001             | 8.02        | 0.32-77.64                                        | 0.7788                        | 0.1756                        | 0.0408                        | 0.0048                        |
| IF3        | 49,957             | 20.01            | < 0.0001             | 8.11        | 0.33-78.42                                        | 0.7744                        | 0.1788                        | 0.0419                        | 0.0049                        |
| IF4        | 49,657             | 20.64            | < 0.0001             | 8.31        | 0.35-79.69                                        | 0.7688                        | 0.1833                        | 0.0422                        | 0.0058                        |
| IVB        | 48,570             | 17.55            | 0.5179               | 7.02        | 0.30-69.16                                        | 0.8048                        | 0.1593                        | 0.0322                        | 0.0037                        |
| ITG        | 48,371             | 17.63            | n.a                  | 7.03        | 0.29-68.69                                        | 0.8048                        | 0.1587                        | 0.0327                        | 0.0038                        |
| UKO        | 49,295             | 18.03            | 0.02151              | 7.44        | 0.31-72.34                                        | 0.7952                        | 0.1649                        | 0.0363                        | 0.0035                        |
| UKG        | 49,062             | 17.98            | n.a                  | 7.26        | 0.30-69.72                                        | 0.7979                        | 0.1648                        | 0.0334                        | 0.0038                        |

The average haplotype length in the isolates IF1, IF2, IF3, IF4 and FIK is significantly longer than in their general populations ITG and FIG, but no difference was observed between GRM, IVB and UKO and their general populations GRG, ITG and UKG. The proportion of different classes of haplotypes in IF1, IF2, IF3, IF4 and FIK are also substantially different from in their general populations: ITG and FIG, in particular, have a higher proportion of shorter haplotypes. No difference between GRM, IVB and UKO and their general populations GRG, ITG and UKG was found. These results again suggest that IF1, IF2, IF3, IF4 and FIK are more isolated than the other isolates.

Supplementary Table 11. Pairwise correlation coefficients (Person's correlation coefficient, r)

|                                           | <i>I<sub>ST</sub></i> | <i>F<sub>ST</sub></i> | F     | ROH<br>(1.0 Mb) | Haplotype<br>-length | <i>D<sub>vxy</sub></i> -<br><i>coding</i> |
|-------------------------------------------|-----------------------|-----------------------|-------|-----------------|----------------------|-------------------------------------------|
| <i>F<sub>ST</sub></i>                     | 0.975                 |                       |       |                 |                      |                                           |
| F                                         | 0.969                 | 0.901                 |       |                 |                      |                                           |
| ROH<br>(1.0 Mb)                           | 0.992                 | 0.948                 | 0.955 |                 |                      |                                           |
| Haplotype-<br>length                      | 0.918                 | 0.866                 | 0.977 | 0.941           |                      |                                           |
| <i>D<sub>vxy</sub></i> -<br><i>coding</i> | 0.801                 | 0.772                 | 0.859 | 0.787           | 0.848                |                                           |
| <i>SV<sub>xy</sub></i>                    | 0.912                 | 0.901                 | 0.905 | 0.920           | 0.929                | 0.72                                      |

Supplementary Table 12.  $R_{xy}$  statistics.

| Population pair | $R_{xy}$ - <i>missense</i> | $R_{xy}$ - <i>LoF</i> | $R_{xy}$ -variants with CADD>10 | $R_{xy}$ -variants with CADD>20 |
|-----------------|----------------------------|-----------------------|---------------------------------|---------------------------------|
| FIK-FIG         | 1.007 (1.002-1.013)        | 0.991 (0.967-1.014)   | 1.000 (0.999-1.000)             | 0.998 (0.995-1.002)             |
| GRM-GRG         | 1.017 (1.005-1.029)        | 1.047 (0.993-1.102)   | 1.011 (1.010-1.013)             | 1.011 (1.005-1.016)             |
| GRM-ITG         | -                          | -                     | 1.000 (0.999-1.002)             | 0.996 (0.991-1.000)             |
| IF1- ITG:60     | 0.983 (0.972-0.995)        | 1.005 (0.954-1.057)   | 0.995 (0.993-0.997)             | 0.988 (0.981-0.995)             |
| IF2- ITG:45     | 0.989 (0.978-1.000)        | 0.963 (0.910-1.016)   | 0.993 (0.991-0.995)             | 0.985 (0.978-0.992)             |
| IF3- ITG:47     | 0.984 (0.973-0.996)        | 0.979 (0.926-1.032)   | 0.995 (0.993-0.997)             | 0.988 (0.980-0.995)             |
| IF4- ITG:36     | 0.982 (0.969-0.995)        | 0.966 (0.910-1.022)   | 0.992 (0.990-0.995)             | 0.988 (0.980-0.997)             |
| IVB-ITG         | 0.971 (0.717-1.227)        | 1.000 (0.967-1.033)   | 0.993 (0.992-0.994)             | 0.986 (0.982-0.990)             |
| UKO-UKG         | 1.009 (1.003-1.016)        | 1.019 (0.984-1.055)   | 1.003 (1.002-1.004)             | 1.004 (1.001-1.008)             |

Overall, we did not find any isolate that showed a significantly higher genetic burden for either  $R_{xy}$ -*missense* or  $R_{xy}$ -*LoF* variants, although we see a marginally lower genetic burden for missense variants in IF1, IF3 and IF4.  $R_{xy}$  using variants with CADD scores greater than 10 and 20 should increase statistical power, since we include a larger set of genome-wide functional variants. We also failed to find convincing evidence to support higher or lower genetic loads in the isolates. These results are consistent with previous studies, as the genetic load is affected by both population demography and selection<sup>21</sup>.

Supplementary Table 13. *DV<sub>xy</sub>-coding* statistics in each population. The value at the top of each cell is the median and below in brackets are the 95<sup>th</sup> percentiles. Coding DVs are missense plus LoF variants.

| Population | No. of missense DVs | No. of coding DVs   | No. of intergenic DVs     | <i>DV<sub>x</sub>-missense</i> | <i>DV<sub>x</sub>-coding</i> | <i>DV<sub>xy</sub> - missense</i> | <i>DV<sub>xy</sub> - coding</i> |
|------------|---------------------|---------------------|---------------------------|--------------------------------|------------------------------|-----------------------------------|---------------------------------|
| FIK        | 694<br>(657-735)    | 724<br>(663-772)    | 42662<br>(39870-45600)    | 1.27<br>(1.25-1.30)            | 1.28<br>(1.25-1.32)          | 1.14<br>(1.10-1.20)               | 1.14<br>(1.10-1.20)             |
| FIG        | 610<br>(553-644)    | 626<br>(573-667)    | 42459<br>(38294-45351)    | 1.12<br>(1.07-1.15)            | 1.13<br>(1.08-1.17)          | 0.88<br>(0.83-0.91)               | 0.87<br>(0.83-0.91)             |
| GRM        | 1053<br>(984-1111)  | 1084<br>(1014-1153) | 75156<br>(70312-79977)    | 1.20<br>(1.17-1.22)            | 1.2<br>(1.17-1.21)           | 1.02<br>(1-1.05)                  | 1.02<br>(0.99-1.04)             |
| GRG        | 1176<br>(1091-1242) | 1200<br>(1116-1254) | 84491<br>(80696-90914)    | 1.18<br>(1.15-1.20)            | 1.18<br>(1.15-1.2)           | 0.98<br>(0.96-1.00)               | 0.98<br>(0.96-1.01)             |
| IF1        | 2020<br>(1666-2113) | 2086<br>(1726-2170) | 123238<br>(108383-131977) | 1.33<br>(1.3-1.35)             | 1.31<br>(1.29-1.33)          | 1.24<br>(1.22-1.27)               | 1.24<br>(1.21-1.27)             |
| IF2        | 2345<br>(1969-2461) | 2414<br>(2053-2528) | 139062<br>(121300-147611) | 1.29<br>(1.27-1.3)             | 1.29<br>(1.28-1.30)          | 1.17<br>(1.15-1.18)               | 1.16<br>(1.15-1.18)             |
| IF3        | 1868<br>(1596-1961) | 1926<br>(1607-2019) | 109618<br>(94308-116039)  | 1.32<br>(1.31-1.34)            | 1.32<br>(1.31-1.34)          | 1.21<br>(1.2-1.23)                | 1.22<br>(1.20-1.24)             |
| IF4        | 1600<br>(1344-1666) | 1655<br>(1392-1740) | 99244<br>(87929-105109)   | 1.28<br>(1.26-1.3)             | 1.28<br>(1.26-1.3)           | 1.18<br>(1.16-1.21)               | 1.18<br>(1.16-1.21)             |
| IVB        | 814<br>(743-862)    | 850<br>(784-897)    | 52765<br>(48339-55892)    | 1.29<br>(1.27-1.32)            | 1.31<br>(1.29-1.33)          | 1.06<br>(1.03-1.09)               | 1.08<br>(1.05-1.12)             |
| ITG_IF1    | 1903<br>(1786-2004) | 1948<br>(1850-2039) | 159276<br>(145544-168162) | 1.07<br>(1.06-1.09)            | 1.08<br>(1.06-1.09)          | 0.81<br>(0.79-0.82)               | 0.81<br>(0.79-0.82)             |
| ITG_IF2    | 2784<br>(2645-2938) | 2860<br>(2755-3038) | 209247<br>(192533-222310) | 1.10<br>(1.10-1.12)            | 1.11<br>(1.1-1.12)           | 0.86<br>(0.85-0.87)               | 0.86<br>(0.85-0.87)             |
| ITG_IF3    | 2696<br>(2555-2825) | 2768<br>(2607-2910) | 201718<br>(189391-213989) | 1.09<br>(1.08-1.10)            | 1.09<br>(1.08-1.10)          | 0.82<br>(0.81-0.83)               | 0.82<br>(0.81-0.83)             |
| ITG_IF4    | 2198<br>(2072-2305) | 2240<br>(2112-2360) | 169550<br>(158619-182002) | 1.08<br>(1.06-1.09)            | 1.08<br>(1.06-1.10)          | 0.85<br>(0.83-0.86)               | 0.85<br>(0.83-0.86)             |
| ITG_IVB    | 672<br>(609-700)    | 674<br>(614-717)    | 47913<br>(44727-51476)    | 1.21<br>(1.19-1.25)            | 1.21<br>(1.18-1.23)          | 0.94<br>(0.91-0.97)               | 0.93<br>(0.89-0.95)             |
| UKO        | 482<br>(436-506)    | 486<br>(440-516)    | 30663<br>(28650-32864)    | 1.28<br>(1.24-1.31)            | 1.29<br>(1.27-1.33)          | 1.14<br>(1.09-1.19)               | 1.11<br>(1.07-1.17)             |
| UKG        | 383<br>(340-401)    | 398<br>(349-419)    | 28584<br>(26464-30568)    | 1.13<br>(1.08-1.16)            | 1.15<br>(1.1-1.18)           | 0.88<br>(0.84-0.92)               | 0.90<br>(0.85-0.94)             |

Supplementary Table 14. *DV<sub>xy</sub>-wg* statistics for each population. The value at the top of each cell is the median and below in brackets are the 95<sup>th</sup> percentiles.

| Population<br>s | % of DV<br>CADD 0-5        | % of DV<br>CADD 5-10       | % of DV<br>CADD<br>10-20 | % of DV<br>CADD<br>>20 | <i>DV<sub>xy</sub></i><br>CADD 0-5 | <i>DV<sub>xy</sub></i><br>CADD 5-<br>10 | <i>DV<sub>xy</sub></i><br>CADD 10-<br>20 | <i>DV<sub>xy</sub></i><br>CADD >20 |
|-----------------|----------------------------|----------------------------|--------------------------|------------------------|------------------------------------|-----------------------------------------|------------------------------------------|------------------------------------|
| FIK             | 76.59<br>(76.3-<br>76.83)  | 15.62<br>(15.52-<br>15.75) | 6.68<br>(6.58-<br>6.82)  | 1.10<br>(1.05-1.15)    | 0.991<br>(0.986-<br>0.998)         | 1.014<br>(0.999-<br>1.035)              | 1.021<br>(0.987-<br>1.048)               | 1.387<br>(1.266-<br>1.509)         |
| FIG             | 77.36<br>(77.12-<br>77.48) | 15.36<br>(15.24-<br>15.52) | 6.55<br>(6.41-<br>6.67)  | 0.81<br>(0.76-0.85)    | 1.009<br>(1.002-<br>1.014)         | 0.986<br>(0.966-<br>1.001)              | 0.979<br>(0.954-<br>1.013)               | 0.721<br>(0.663-0.79)              |
| GRM             | 77.67<br>(77.49-<br>77.84) | 15.37<br>(15.27-<br>15.46) | 6.18<br>(6.10-<br>6.23)  | 0.81<br>(0.78-0.84)    | 1.000<br>(0.997-<br>1.005)         | 1.008<br>(0.996-<br>1.017)              | 1.025<br>(1.005-<br>1.052)               | 1.081<br>(0.996-<br>1.121)         |
| GRG             | 77.39<br>(77.17-<br>77.54) | 15.39<br>(15.27-<br>15.51) | 6.03<br>(6.02-<br>6.06)  | 0.75<br>(0.73-0.79)    | 1.000<br>(0.995-<br>1.003)         | 0.992<br>(0.983-<br>1.004)              | 0.975<br>(0.95-<br>0.995)                | 0.925<br>(0.901-<br>1.017)         |
| IF1             | 76.54<br>(76.35-<br>76.81) | 15.76<br>(15.63-<br>15.85) | 6.7<br>(6.58-<br>6.77)   | 1.00<br>(0.96-1.03)    | 0.989<br>(0.985-<br>0.995)         | 1.012<br>(0.998-<br>1.022)              | 1.058<br>(1.028-<br>1.081)               | 1.354<br>(1.261-<br>1.439)         |
| IF2             | 76.71<br>(76.5-<br>76.92)  | 15.65<br>(15.48-<br>15.76) | 6.66<br>(6.60-<br>6.72)  | 1.01<br>(0.96-1.04)    | 0.994<br>(0.991-<br>1.000)         | 1.006<br>(0.987-<br>1.014)              | 1.027<br>(1.004-<br>1.049)               | 1.211<br>(1.154-<br>1.295)         |
| IF3             | 76.77<br>(76.49-<br>77.08) | 15.53<br>(15.35-<br>15.65) | 6.74<br>(6.61-<br>6.82)  | 0.99<br>(0.95-1.04)    | 0.993<br>(0.990-<br>0.998)         | 1.004<br>(0.993-<br>1.014)              | 1.045<br>(1.019-<br>1.066)               | 1.166<br>(1.089-1.27)              |
| IF4             | 76.78<br>(76.65-<br>77.26) | 15.68<br>(15.36-<br>15.77) | 6.56<br>(6.45-<br>6.67)  | 0.95<br>(0.92-0.98)    | 0.994<br>(0.990-<br>1.001)         | 1.011<br>(0.989-<br>1.022)              | 1.022<br>(0.994-<br>1.048)               | 1.180<br>(1.120-<br>1.267)         |
| IVB             | 77.18<br>(76.97-<br>77.42) | 15.42<br>(15.27-<br>15.52) | 6.49<br>(6.40-<br>6.58)  | 0.92<br>(0.87-0.98)    | 1.000<br>(0.997-<br>1.005)         | 0.976<br>(0.959-<br>0.986)              | 1.045<br>(1.016-<br>1.077)               | 1.095<br>(1.018-<br>1.191)         |
| ITG_IF1         | 77.33<br>(77.13-<br>77.44) | 15.57<br>(15.48-<br>15.71) | 6.34<br>(6.30-<br>6.42)  | 0.74<br>(0.72-0.77)    | 1.011<br>(1.005-<br>1.015)         | 0.989<br>(0.978-<br>1.002)              | 0.974<br>(0.954-<br>0.996)               | 0.825<br>(0.772-<br>0.866)         |
| ITG_IF2         | 77.19<br>(77.07-<br>77.28) | 15.53<br>(15.5-15.58)      | 6.46<br>(6.38-<br>6.55)  | 0.82<br>(0.78-0.84)    | 1.006<br>(1.000-<br>1.009)         | 0.994<br>(0.986-<br>1.014)              | 0.945<br>(0.925-<br>0.973)               | 0.739<br>(0.695-<br>0.793)         |
| ITG_IF3         | 77.2<br>(76.97-<br>77.31)  | 15.48<br>(15.44-<br>15.58) | 6.48<br>(6.41-<br>6.56)  | 0.86<br>(0.83-0.89)    | 1.007<br>(1.002-<br>1.010)         | 0.996<br>(0.987-<br>1.007)              | 0.957<br>(0.938-<br>0.981)               | 0.858<br>(0.787-<br>0.918)         |
| ITG_IF4         | 77.07<br>(76.86-<br>77.36) | 15.58<br>(15.42-<br>15.68) | 6.51<br>(6.39-<br>6.61)  | 0.82<br>(0.79-0.85)    | 1.006<br>(0.999-<br>1.011)         | 0.989<br>(0.979-<br>1.011)              | 0.978<br>(0.955-<br>1.006)               | 0.848<br>(0.789-<br>0.893)         |
| ITG_IVB         | 77.3<br>(77.08-<br>77.4)   | 15.77<br>(15.64-<br>15.87) | 6.15<br>(6.11-<br>6.30)  | 0.81<br>(0.79-0.84)    | 1.000<br>(0.995-<br>1.003)         | 1.025<br>(1.014-<br>1.043)              | 0.957<br>(0.929-<br>0.984)               | 0.914<br>(0.840-<br>0.982)         |
| UKO             | 76.79<br>(76.54-<br>77.07) | 15.75<br>(15.57-<br>15.89) | 6.49<br>(6.41-<br>6.65)  | 0.94<br>(0.87-1.01)    | 0.993<br>(0.989-<br>0.997)         | 1.019<br>(1.006-<br>1.034)              | 1.016<br>(0.991-<br>1.035)               | 1.205<br>(1.089-<br>1.294)         |
| UKG             | 77.38<br>(77.14-<br>77.63) | 15.45<br>(15.22-<br>15.59) | 6.38<br>(6.30-<br>6.55)  | 0.78<br>(0.74-0.82)    | 1.007<br>(1.003-<br>1.011)         | 0.981<br>(0.967-<br>0.994)              | 0.984<br>(0.966-<br>1.009)               | 0.830<br>(0.773-<br>0.918)         |

Supplementary Table 15.  $G_{SV}$  and  $SV_{xy}$  statistics in each pair of populations.

| Population pairs | Isx  | Total number of genes | Total number of essential genes | Total number of non-essential genes | percentage of the essential genes with SV>1 in isolates | percentage of the non-essential genes with SV>1 in isolates | percentage of the essential genes with SV>1 in general population | percentage of the non-essential genes with SV>1 in general population | Gsv_general  |              |           |         |
|------------------|------|-----------------------|---------------------------------|-------------------------------------|---------------------------------------------------------|-------------------------------------------------------------|-------------------------------------------------------------------|-----------------------------------------------------------------------|--------------|--------------|-----------|---------|
|                  |      |                       |                                 |                                     |                                                         |                                                             |                                                                   |                                                                       | Gsv_isolates | Gsv_isolates | Mean_SVxy | SD_SVxy |
| FIK_FIG          | 1.41 | 2957                  | 271                             | 2609                                | 0.76                                                    | 0.75                                                        | 0.66                                                              | 0.72                                                                  | 1.01         | 0.92         | 1.134     | 0.061   |
| GRM_GRG          | 1.28 | 3131                  | 308                             | 2823                                | 0.75                                                    | 0.71                                                        | 0.69                                                              | 0.71                                                                  | 1.06         | 0.97         | 1.016     | 0.063   |
| IF1_ITG          | 1.73 | 2473                  | 231                             | 2242                                | 0.79                                                    | 0.77                                                        | 0.68                                                              | 0.72                                                                  | 1.03         | 0.94         | 1.403     | 0.103   |
| IF2_ITG          | 1.71 | 2757                  | 264                             | 2493                                | 0.78                                                    | 0.76                                                        | 0.68                                                              | 0.72                                                                  | 1.03         | 0.94         | 1.321     | 0.085   |
| IF3_ITG          | 1.74 | 2624                  | 251                             | 2373                                | 0.82                                                    | 0.78                                                        | 0.64                                                              | 0.71                                                                  | 1.05         | 0.90         | 1.464     | 0.114   |
| IF4_ITG          | 1.75 | 2550                  | 253                             | 2297                                | 0.72                                                    | 0.77                                                        | 0.69                                                              | 0.71                                                                  | 0.94         | 0.97         | 1.327     | 0.085   |
| IVB_ITG          | 1.11 | 3953                  | 387                             | 3566                                | 0.72                                                    | 0.72                                                        | 0.68                                                              | 0.71                                                                  | 1.00         | 0.96         | 1.108     | 0.062   |
| UKO_UKG          | 1.18 | 3540                  | 357                             | 3183                                | 0.72                                                    | 0.73                                                        | 0.67                                                              | 0.72                                                                  | 0.99         | 0.93         | 1.012     | 0.049   |

The isolates showed a higher proportion of essential genes with  $SV > 1$  relative to non-essential ones, compared with their general populations. The distribution of  $G_{sv}$  scores in the isolates is significantly different from the scores in the general populations (Mann-Whitney U test,  $p$  value = 0.0039) with relatively higher values of  $G_{sv}$  in the isolates. The  $SV_{xy}$  statistics are significantly greater than 1 for FIG and four Italian isolates, IF1, IF2, IF3 and IF4, but not for GRM, IVB and UGO, which could be due to the separate calling method for the GRG and sample ascertainment for all three. Overall, both  $G_{sv}$  and  $SV_{xy}$  statistics suggest a relaxation of purifying selection in the isolates.

Supplementary Table 16. Summary of numbers of highly differentiated sites in the isolates.

|         | DeltaDAF<br>$\geq 0.5$ | DeltaDAF<br>$\geq 0.4$ | DeltaDAF<br>$\geq 0.3$ | PCadapt<br>outlier with<br>deltaDAF<br>$\geq 0.5$ | PCadapt<br>outlier with<br>deltaDAF<br>$\geq 0.4$ | PCadapt<br>outlier with<br>deltaDAF<br>$\geq 0.3$ |
|---------|------------------------|------------------------|------------------------|---------------------------------------------------|---------------------------------------------------|---------------------------------------------------|
| FIG-FIK | 0                      | 0                      | 1                      | 0                                                 | 0                                                 | 0                                                 |
| GRG-GRM | 0                      | 0                      | 0                      | 0                                                 | 0                                                 | 0                                                 |
| ITG-IF1 | 6                      | 28                     | 52                     | 0                                                 | 23                                                | 119                                               |
| ITG-IF2 | 1                      | 17                     | 52                     | 0                                                 | 16                                                | 204                                               |
| ITG-IF3 | 4                      | 36                     | 54                     | 0                                                 | 26                                                | 249                                               |
| ITG-IF4 | 6                      | 49                     | 54                     | 0                                                 | 57                                                | 516                                               |
| ITG-IVB | 3                      | 8                      | 22                     | 0                                                 | 0                                                 | 0                                                 |
| UKG-UKO | 35                     | 45                     | 52                     | 0                                                 | 4                                                 | 6                                                 |

We identified in total 47, 170 and 249 unique HighD sites in the eight isolates with deltaDAF greater than or equal to 0.5, 0.4 and 0.3, respectively. We did not find any sites in the FIK with deltaDAF greater than 0.5 and only one site with deltaDAF greater than 0.3, which reflects the recent divergence from FIG. The UKO showed the highest number of HighD sites with deltaDAF  $\geq 0.5$ . However, of the sites with deltaDAF  $\geq 0.5$ , 42 of 47 lie in segmental duplication regions, or other repeat regions, which are likely artifacts. However, one of the other five is the well-known lactose tolerance SNP (rs4988183) in IF1 compared with ITG. IF1's ancestral population is from north Europe, so this is likely to represent a site selected between north and south European populations, rather than IF1-specific selection. We failed to find compelling biological evidence for positive selection at the other four sites.



Supplementary Table 17. Overlap between highly differentiated sites from both HighD analyses and PCAdapt. The highlighted variants are the ones shared among IF2, IF3 and IF4.

| POP-pair | SNP         | CHR | Location  | Ancestral_allele | Derived_allele | General_DAF | Isolate_DAF | Delta_DAF | HGNC symbol   | Consequence                   | CADD score |
|----------|-------------|-----|-----------|------------------|----------------|-------------|-------------|-----------|---------------|-------------------------------|------------|
| IF1-ITG  | rs112863601 | 2   | 208802168 | C                | T              | 0.311       | 0.717       | 0.405     | PLEKHM3       | intron_variant                | 2.454      |
| IF1-ITG  | rs9828592   | 3   | 33044339  | T                | C              | 0.491       | 0.875       | 0.384     | GLB1          | intron_variant                | 2.785      |
| IF1-ITG  | rs1398759   | 3   | 124888905 | G                | C              | 0.434       | 0.817       | 0.383     | SLC12A8       | intron_variant                | 1.764      |
| IF1-ITG  | rs1789693   | 11  | 74887165  | A                | T              | 0.250       | 0.708       | 0.458     | SLCO2B1       | intron_variant                | 7.651      |
| IF1-ITG  | rs28520541  | 12  | 121997478 | A                | G              | 0.208       | 0.575       | 0.368     | KDM2B         | intron_variant                | 6.89       |
| IF1-ITG  | rs2389240   | 13  | 96132701  | A                | C              | 0.250       | 0.625       | 0.375     | CLDN10-AS1    | non_coding_transcript_variant | 3.996      |
| IF1-ITG  | rs3843738   | 17  | 43739194  | A                | G              | 0.316       | 0.683       | 0.367     | RP11-105N13.4 | non_coding_transcript_variant | 8.144      |
| IF1-ITG  | rs55893840  | 17  | 71000371  | A                | G              | 0.255       | 0.717       | 0.462     | SLC39A11      | intron_variant                | 0.382      |
| IF2-ITG  | rs7415711   | 1   | 86457896  | G                | C              | 0.415       | 0.833       | 0.418     | COL24A1       | intron_variant                | 0.195      |
| IF2-ITG  | rs13391086  | 2   | 29615864  | C                | T              | 0.028       | 0.400       | 0.372     | ALK           | intron_variant                | 1.049      |
| IF2-ITG  | rs11924625  | 3   | 33070158  | A                | T              | 0.326       | 0.700       | 0.375     | GLB1          | intron_variant                | 0.024      |
| IF2-ITG  | rs7660497   | 4   | 58973339  | C                | T              | 0.203       | 0.589       | 0.386     | SRIP1         | downstream_gene_variant       | 4.403      |
| IF2-ITG  | rs3113813   | 4   | 137859741 | G                | C              | 0.156       | 0.478       | 0.322     | RP11-13817.1  | non_coding_transcript_variant | 0.44       |
| IF2-ITG  | rs190605097 | 9   | 39002471  | G                | T              | 0.401       | 0.878       | 0.477     | -             | intergenic_variant            | 0.218      |
| IF2-ITG  | rs12789966  | 11  | 99041999  | A                | G              | 0.288       | 0.711       | 0.423     | CNTN5         | intron_variant                | 1.274      |
| IF2-ITG  | rs10130552  | 14  | 71085815  | C                | T              | 0.170       | 0.611       | 0.441     | CTD-2540L5.6  | non_coding_transcript_variant | 3.316      |
| IF2-ITG  | rs34956586  | 17  | 4430958   | T                | C              | 0.283       | 0.722       | 0.439     | SPNS2         | intron_variant                | 4.955      |
| IF2-ITG  | rs55893840  | 17  | 71000371  | A                | G              | 0.255       | 0.633       | 0.379     | SLC39A11      | intron_variant                | 0.382      |
| IF3-ITG  | rs13391086  | 2   | 29615864  | C                | T              | 0.028       | 0.436       | 0.408     | ALK           | intron_variant                | 1.049      |
| IF3-ITG  | rs1493927   | 3   | 19340911  | C                | T              | 0.316       | 0.745       | 0.429     | KCNH8         | intron_variant                | 1.357      |
| IF3-ITG  | rs6549575   | 3   | 67061960  | G                | A              | 0.349       | 0.766       | 0.417     | KBTBD8        | downstream_gene_variant       | 3.003      |
| IF3-ITG  | rs4947937   | 7   | 50907588  | C                | A              | 0.344       | 0.840       | 0.496     | AC004920.3    | non_coding_transcript_variant | 2.682      |
| IF3-ITG  | rs35587464  | 8   | 121924092 | C                | T              | 0.274       | 0.670       | 0.397     | RP11-369K17.1 | upstream_gene_variant         | 3.961      |
| IF3-ITG  | rs7304148   | 12  | 10870231  | T                | C              | 0.226       | 0.617       | 0.391     | YBX3          | intron_variant                | 10.07      |
| IF3-ITG  | rs1525947   | 12  | 119456896 | C                | T              | 0.184       | 0.670       | 0.486     | SRRM4         | intron_variant                | 3.787      |
| IF3-ITG  | rs10130552  | 14  | 71085815  | C                | T              | 0.170       | 0.617       | 0.447     | CTD-2540L5.6  | non_coding_transcript_variant | 3.316      |
| IF3-ITG  | rs1119141   | 16  | 84437223  | T                | C              | 0.406       | 0.798       | 0.392     | ATP2C2        | intron_variant                | 1.02       |
| IF3-ITG  | rs55893840  | 17  | 71000371  | A                | G              | 0.255       | 0.596       | 0.341     | SLC39A11      | intron_variant                | 0.382      |
| IF3-ITG  | rs67719508  | 20  | 33487278  | T                | C              | 0.212       | 0.660       | 0.447     | ACSS2         | intron_variant                | 1.417      |
| IF3-ITG  | rs1153336   | 21  | 41157658  | C                | G              | 0.203       | 0.638       | 0.436     | IGSF5         | intron_variant                | 1.322      |
| IF3-ITG  | rs2839327   | 21  | 47982652  | A                | G              | 0.175       | 0.553       | 0.379     | DIP2A         | intron_variant                | 0.634      |
| IF4-ITG  | rs13391086  | 2   | 29615864  | C                | T              | 0.028       | 0.431       | 0.402     | ALK           | intron_variant                | 1.049      |
| IF4-ITG  | rs6734194   | 2   | 153466691 | G                | T              | 0.387       | 0.847       | 0.460     | FMNL2         | intron_variant                | 3.689      |
| IF4-ITG  | rs3020453   | 3   | 39325523  | T                | C              | 0.113       | 0.597       | 0.484     | CX3CR1        | upstream_gene_variant         | 2.529      |
| IF4-ITG  | rs3113813   | 4   | 137859741 | G                | C              | 0.156       | 0.597       | 0.442     | RP11-13817.1  | non_coding_transcript_variant | 0.44       |
| IF4-ITG  | rs434602    | 6   | 6165468   | T                | C              | 0.307       | 0.736       | 0.430     | F13A1         | intron_variant                | 2.308      |
| IF4-ITG  | rs4475409   | 7   | 83621932  | T                | C              | 0.245       | 0.667       | 0.421     | SEMA3A        | intron_variant                | 0.982      |
| IF4-ITG  | rs2469386   | 8   | 3515312   | C                | A              | 0.231       | 0.708       | 0.477     | CSMD1         | intron_variant                | 0.515      |
| IF4-ITG  | rs7092649   | 10  | 60005202  | G                | A              | 0.198       | 0.639       | 0.441     | IPMK          | intron_variant                | 1.301      |
| IF4-ITG  | rs11222788  | 11  | 131649367 | C                | G              | 0.137       | 0.597       | 0.460     | NTM           | intron_variant                | 2.81       |
| IF4-ITG  | rs199984077 | 13  | 110078785 | T                | C              | 0.142       | 0.639       | 0.497     | -             | intergenic_variant            | 1.337      |
| IF4-ITG  | rs10130552  | 14  | 71085815  | C                | T              | 0.170       | 0.667       | 0.497     | CTD-2540L5.6  | non_coding_transcript_variant | 3.316      |
| IF4-ITG  | rs8037845   | 15  | 93805290  | G                | T              | 0.156       | 0.569       | 0.414     | RP11-326A13.1 | downstream_gene_variant       | 0.105      |
| IF4-ITG  | rs191732434 | 16  | 3131937   | A                | C              | 0.288       | 0.792       | 0.504     | RP11-473M20.9 | non_coding_transcript_variant | 0.132      |
| IF4-ITG  | rs4843293   | 16  | 88028003  | G                | A              | 0.363       | 0.750       | 0.387     | BANP          | intron_variant                | 1.159      |
| IF4-ITG  | rs34956586  | 17  | 4430958   | T                | C              | 0.283       | 0.611       | 0.328     | SPNS2         | intron_variant                | 4.955      |
| IF4-ITG  | rs55893840  | 17  | 71000371  | A                | G              | 0.255       | 0.625       | 0.370     | SLC39A11      | intron_variant                | 0.382      |
| IF4-ITG  | rs67719508  | 20  | 33487278  | T                | C              | 0.212       | 0.583       | 0.371     | ACSS2         | intron_variant                | 1.417      |
| IF4-ITG  | rs140038    | 22  | 36964359  | C                | T              | 0.340       | 0.778       | 0.438     | CACNG2        | intron_variant                | 6.845      |

PCAdapt-fast version was applied to each pair of populations separately (one isolate and its corresponding general population) using the whole-sample dataset for variants with MAF >0.05. Subsequently the p-values were transformed into q-values using the R package qvalue (<http://github.com/jdstorey/qvalue>) to filter the SNPs with false discovery rate (FDR) <0.1. All the variants were further filtered by requiring the derived allele frequency in isolates to be > 0.30. In total, 1077 sites met these criteria, with IF4 having the most; we did not find any sites in FIK, IVB and GRM (Supplementary Data). 39 of these sites overlapped with the HighD sites. We did not find any missense, LoF or other coding functional changes in the overlap, but three SNPs had

CADD scores greater than 5, indicating that they are potentially functionally important. The most interesting finding from these analyses was that six of these variants are shared between different isolates from Italy: IF2, IF3 and IF4. We interpret these as sites that were potentially positively selected in the ITG for the ancestral allele after the population split from the isolates. However, the underlying selection force is unclear. Four SNPs lie in the protein-coding genes *ALK*, *SPNS2*, *SLC39A11* and *ACSS2*, and may merit future follow-up. *ALK* is a gene involved in obesity<sup>22</sup> and glucose homeostasis<sup>23</sup> traits; *SPNS2* is also implicated in obesity<sup>24</sup>. *SLC39A11* was linked to pathways associated with relative hand skill<sup>25</sup>, and finally *ACSS2* was linked to protein C levels<sup>26</sup>.

## Supplementary Notes

### Variant calling and counts

#### SNP site selection

SNP sites were included based on the following cumulative strategy (i.e. a + b + c): a) all sites in the isolates: FIK, GRM, IF1, IF2, IF3, IF4, IVB and UKO and the general population FIG. b) all sites in the 1000 Genomes Phase 3 populations, thus also including the Toscani from Italy (ITG, labelled as TSI in 1000 Genomes publications). c) all sites with a non-reference allele count,  $AC \geq 5$  in the UKG.

Additionally, we required a non-reference allele count,  $AC \geq 1$ , within the input set of individuals, a technicality due to some call sets having been made together with external data, thus avoiding sites which are not polymorphic in the samples used. Only the autosomes were considered.

#### Genotype likelihood calculation

Genotype likelihoods were calculated with samtools/bcftools (0.2.0-rc9) on the dataset above, plus the 21 other worldwide populations in the 1000 Genomes Phase 3 data<sup>19</sup>:

```
samtools mpileup -IE -C50 -d100000 -t DP,DP4 -l wgs.isolates.union.AC1.vcf.gz  
bcftools call -mAC alleles -f GQ,GP -T wgs.isolates.union.AC1.alleles.gz
```

We dropped three samples from IVB (EGAN00001098982, XX129575 and XX021810) and two samples from UKO (EGAN00001098982 and EGAN00001010505) due to their high ratio of heterozygous to homozygous calls compared to all other samples. This can be a sign of contamination or different ancestry.

#### Genotype calling

Genotypes were called and phased using Beagle v4 (r1274)<sup>27</sup>. The input genotype likelihood VCFs were split into regions containing a minimum of 3000 sites with 500 buffer sites on either side of the region.

```
java $jvm_args -jar b4.r1274.jar  
  phase-its=5  
  nthreads=12  
  gl=$region.in.vcf.gz  
  out=$region.out
```

The overlapping output region VCFs were then ligated to per-chromosome VCF files using ‘bcftools concat -l’.

#### Annotation

Only the INFO/DP and FORMAT/GT from the original vcf files were kept, while the INFO/AC, INFO/AN, INFO/AF, INFO/NS were added with bcftools to annotate the complete dataset. INFO/AA (ancestral allele) was added with fill-aa using files from the 1000 Genome Phase 3 ancestral allele file.

INFO/GERP was added using bcftools annotate.

The ID column was filled with rsIDs from dbSNP141 using bcftools annotate.

Variant Effect predictor (VEP) annotation from Ensembl 76 was added with:

```
variant_effect_predictor.pl
--assembly GRCh37
--everything
--allele_number
--plugin Condel,/path/to/config/Condel/config/,b
--plugin Blosum62
--plugin LoF, human_ancestor_fa:/path/to/human_ancestor.fa.rz
--format vcf
--vcf
--cache
--dir /path/to/vep_cache
--no_progress
--quiet
--offline
--force_overwrite
--no_stats
```

including the LOFTEE plugin (<https://github.com/konradjk/loftee>) for identifying LoF (loss-of-function) variation.

## Files and availability

- {CHROM}.ISOLATES.mpileup.beagle.anno.20140815.vcf.gz: phased genotype calls in VCF format
- {CHROM}.ISOLATES.mpileup.beagle.anno.20140815.bcf: phased genotype calls in BCF format
- {CHROM}.ISOLATES.mpileup.beagle.anno.20140815.sites.vcf.gz: sites-only VCF files
- {CHROM}.ISOLATES.mpileup.beagle.anno.20140815.vcf.gz.stats: stats file generated by `bcftools stats`
- {CHROM}.ISOLATES-summary.pdf: default summary slides from `bcftools stats`
- README.20140815: this file
- ISOLATES.panel: lists all 9,375 samples and their cohort
- ISOLATES.cohorts: lists the cohorts
- 1000G\_related\_individuals.txt: lists related individuals in the Phase3 release.
- UK10K\_exclusion\_from\_association.txt: lists samples excluded from certain downstream UK10K analyses due to relatedness, non-European-ness, etc.

All of these files are publicly available from the EGA (accession number: EGAD00001002014) under managed access following completion of a data access agreement.

### **Variant calling for GRG**

100 samples from the HELIC TEENAGE (TEENs of Attica: Genes and Environment) cohort composed of young adults from Athens, Greece, were sequenced at 30X depth using the Illumina HiSeq X Ten platform. Variants were called on a per-sample basis using samtools 0.1.18 against the union of all 29,210,157 sites that were called as non-monomorphic in the whole dataset in the section 1.2. The calling omitted indels and sites where read depth exceeded 3,000 times the average read depth (100,000 reads). Individual VCFs were then merged using bcftools. Across called variants, mean read depth was 32.4X.

### **Validation**

To assess the performance of the genotype calling from the low coverage data, we compared the genotypes against genotype chip data available for a subset of the cohorts. Chip data was available for 1,772 samples in the 1000 Genomes Phase3 cohort, 489 samples in the SISu and Kuusamo cohorts (FIG and FIK) and 2,402 samples in the UK10K cohort (UKG). Discordance rates for each cohort on chromosome 20 are shown in Supplementary Table 2.

## Consortium funding support

**UK10K: ALSPAC:** This study makes use of data generated by the UK10K Consortium. The Wellcome Trust provided funding for UK10K (WT091310). Medical Research Council (S. Ring, MC\_UU\_12015/2, MR/J012165/1 to L. Paternoster, MC\_UU\_12013/1-9 to N. J. Timpson, G. D. Smith, D. Evans, T. Gaunt, H. Shihab). The UK Medical Research Council and the Wellcome Trust (Grant ref: 102215/2/13/2) and the University of Bristol provide core support for ALSPAC. We are extremely grateful to all the families who took part in this study, the midwives for their help in recruiting them, and the whole ALSPAC team, which includes interviewers, computer and laboratory technicians, clerical workers, research scientists, volunteers, managers, receptionists and nurses. The UK Medical Research Council and the Wellcome Trust (Grant ref: 102215/2/13/2) and the University of Bristol provide core support for ALSPAC. This publication is the work of the authors and they will serve as guarantors for the contents of this paper. GWAS data was generated by Sample Logistics and Genotyping Facilities at the Wellcome Trust Sanger Institute and LabCorp (Laboratory Corporation of America) using support from 23andMe.

**TwinsUK:** TwinsUK receives support from the National Institute for Health Research (NIHR) BioResource Clinical Research Facility and Biomedical Research Centre based at Guy's and St Thomas' NHS Foundation Trust and King's College London, Wellcome Trust Sanger Institute and National Eye Institute. The Wellcome Trust provided funding for UK10K (WT091310). EU grant EU FP7 (257082, HEALTH-F5-2011-282510). We are extremely grateful to all the participants who took part in this study, those who helped recruitment and the whole TUK team.

**ORCADES:** ORCADES was supported by the Chief Scientist Office of the Scottish Government (CZB/4/276, CZB/4/710), the Royal Society, the MRC Human Genetics Unit, Arthritis Research UK and the European Union framework program 6 EUROSPAN project (contract no. LSHG-CT-2006-018947). DNA extractions were performed at the Wellcome Trust Clinical Research Facility in Edinburgh. The University of Edinburgh is a charitable body, registered in Scotland, with registration number SC005336.

**HELIC MANOLIS:** This work was funded by the Wellcome Trust (WT098051) and the European Research Council (ERC-2011-StG 280559-SEPI). The MANOLIS study is dedicated to the memory of Manolis Giannakakis, 1978-2010. We thank the residents of the Mylopotamos villages for taking part. The HELIC study has been supported by many individuals who have contributed to sample collection (including Antonis Athanasiadis, Olina Balafouti, Christina Batzaki, Georgios Daskalakis, Eleni Emmanouil, Pounar Feritoglou, Chrisoula Giannakaki, Margarita Giannakopoulou, Kiki Kaldaridou, Anastasia Kaparou, Vasiliki Kariakli, Stella Koinaki, Dimitra Kokori, Maria Konidari, Hara Koundouraki, Dimitris Koutoukidis, Vasiliki Mamakou, Eirini Mamalaki, Eirini Mpamiaki, Nilden Selim, Nesse Souloglou, Maria Tsoukana, Dimitra Tzakou, Katerina Vosdogianni, Niovi Xenaki, Eleni Zengini), data entry (Thanos Antonos, Dimitra Papagrigoriou, Betty Spiliopoulou), sample logistics (Sarah Edkins, Emma Gray), genotyping (Suzannah Bumpstead, Robert Andrews, Hannah Blackburn, Doug Simpkin, Siobhan Whitehead), research administration (Anja Kolb-Kokocinski, Carol Smees, Danielle Walker) and informatics (Kathleen Stirrups, Martin Pollard, Josh Randall).

**SISu Consortium:** The Sequencing Initiative Suomi (SISu) project is an international collaboration between research groups aiming to build tools for genomic medicine ([www.sisuproject.fi](http://www.sisuproject.fi)). These groups are generating whole genome and whole exome sequence

data from Finnish samples and provide data resources for the research community. Key groups of the project are from Universities of Eastern Finland, Oulu and Helsinki and The Institute for Health and Welfare, Finland, Lund University, The Wellcome Trust Sanger Institute, University of Oxford, The Broad Institute of Harvard and MIT, University of Michigan, Washington University in St. Louis, and University of California, Los Angeles (UCLA). The project is coordinated in the Institute for Molecular Medicine Finland at the University of Helsinki. AP and SR are supported by the Academy of Finland (grant no. 251704, 286500, 293404 to AP, and 251217, 285380 to SR), the Wellcome Trust (WT089061 and WT089062), Juselius Foundation, Finnish Foundation for Cardiovascular Research and Biocentrum Helsinki (to SR). HC was supported by the Doctoral Programme in Biomedicine (DPBM), University of Helsinki. PP was supported by the Nordic Information for Action eScience Center NIASC/NordForsk (grant no. 62721 to AP, PP & SR) and by IUT20-60 Omics for health: an integrated approach to understand and predict human disease.

# Data Access Agreement

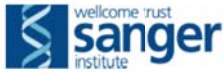

## WTSI Data Access Agreement

WELLCOME TRUST SANGER INSTITUTE

### DATA ACCESS AGREEMENT (August 2014 v7)

These terms and conditions govern access to the managed access datasets (details of which are set out in Appendix I) to which the User Institution has requested access. The User Institution agrees to be bound by these terms and conditions.

### Definitions

**Authorised Personnel:** The individuals at the User Institution to whom WTSI grants access to the Data. This includes the User, the individuals listed on the User Institution's initial request for access to the Data and any other individuals for whom the User Institution subsequently requests access to the Data. Details of the initial Authorised Personnel are set out in Appendix I.

**Data:** The managed access datasets to which the User Institution has requested access.

**Data Producers:** WTSI and the collaborators listed in Appendix I responsible for the development, organisation, and oversight of the Data.

**External Collaborator:** A collaborator of the User, working for an institution other than the User Institution.

**Project:** The project for which the User Institution has requested access to the Data. A description of the Project is set out in Appendix II.

**Publications:** Includes, without limitation, articles published in print journals, electronic journals, reviews, books, posters and other written and verbal presentations of research.

**Research Participant:** An individual whose data form part of the Data.

**Research Purposes:** shall mean research that is seeking to advance the understanding of genetics and genomics, including the treatment of disorders, and work on statistical methods that may be applied to such research.

**User:** The principal investigator for the Project.

**User Institution(s):** The Institution that has requested access to the Data.

**WTSI:** Genome Research Limited, operating as the Wellcome Trust Sanger



Institute

### Terms of the Agreement

1. The User Institution agrees to only use the Data for the purpose of the Project (described in Appendix II) and only for Research Purposes. The User Institution further agrees that it will only use the Data for Research Purposes which are within the limitations (if any) set out in Appendix I.
2. The User Institution agrees to preserve, at all times, the confidentiality of the Data. In particular, it undertakes not to use, or attempt to use the Data to compromise or otherwise infringe the confidentiality of information on Research Participants. Without prejudice to the generality of the foregoing, the User Institution agrees to use at least the measures set out in Appendix I to protect the Data.
3. The User Institution agrees to protect the confidentiality of Research Participants in any research papers or publications that they prepare by taking all reasonable care to limit the possibility of identification.
4. The User Institution agrees not to link or combine the Data to other information or archived data available in a way that could re-identify the Research Participants, even if access to that data has been formally granted to the User Institution or is freely available without restriction.
5. The User Institution agrees only to transfer or disclose the Data, in whole or part, or any material derived from the Data, to the Authorised Personnel. Should the User Institution wish to share the Data with an External Collaborator, the External Collaborator must complete a separate application for access to the Data.
6. The User Institution agrees that the Data Producers, and all other parties involved in the creation, funding or protection of the Data: a) make no warranty or representation, express or implied as to the accuracy, quality or comprehensiveness of the Data; b) exclude to the fullest extent permitted by law all liability for actions, claims, proceedings, demands, losses (including but not limited to loss of profit), costs, awards damages and payments made by the Recipient that may arise (whether directly or indirectly) in any way whatsoever from the Recipient's use of the Data or from the unavailability of, or break in access to, the Data for whatever reason and; c) bear no responsibility for the further analysis or interpretation of these Data.
7. The User Institution agrees to follow the Fort Lauderdale Guidelines ([http://www.wellcome.ac.uk/stellent/groups/corporatesite/@policy\\_communications/documents/web\\_document/wtd003207.pdf](http://www.wellcome.ac.uk/stellent/groups/corporatesite/@policy_communications/documents/web_document/wtd003207.pdf)) and the Toronto Statement

(<http://www.nature.com/nature/journal/v461/n7261/full/461168a.html>). This includes but is not limited to recognising the contribution of the Data Producers and including a proper acknowledgement in all reports or publications resulting from the use of the Data.

8. The User Institution agrees to follow the Publication Policy in Appendix II. This includes respecting the moratorium period for the Data Producers to publish the first peer-reviewed report describing and analysing the Data.

9. The User Institution agrees not to make intellectual property claims on the Data and not to use intellectual property protection in ways that would prevent or block access to, or use of, any element of the Data, or conclusion drawn directly from the Data.

10. The User Institution can elect to perform further research that would add intellectual and resource capital to the data and decide to obtain intellectual property rights on these downstream discoveries. In this case, the User Institution agrees to implement licensing policies that will not obstruct further research and to follow the U.S. National Institutes of Health Best Practices for the Licensing of Genomic Inventions (2005) ([https://www.icgc.org/files/daco/NIH\\_BestPracticesLicensingGenomicInventions\\_2005\\_en.pdf](https://www.icgc.org/files/daco/NIH_BestPracticesLicensingGenomicInventions_2005_en.pdf)) in conformity with the Organisation for Economic Co-operation and Development Guidelines for the Licensing of the Genetic Inventions (2006) (<http://www.oecd.org/science/biotech/36198812.pdf>).

11. WTSI is funded by the Wellcome Trust whose charitable objective is to improve health. If results arising from the User Institution's use of the Data could provide health solutions for the benefit of people in the developing world, the User Institution agrees to offer non-exclusive licenses to such results on a reasonable basis for use in low income and low-middle income countries (as defined by the World Bank) to any party that requests such a license solely for uses within these territories.

12. The User Institution agrees to destroy/discard the Data held, once it is no longer used for the Project, unless obliged to retain the data for archival purposes in conformity with audit or legal requirements.

13. The User Institution will notify WTSI within 30 days of any changes or departures of Authorised Personnel.

14. The User Institution will notify WTSI prior to any significant changes to the protocol for the Project.

15. The User Institution will notify WTSI as soon as it becomes aware of a breach of the terms or conditions of this agreement.

16. WTSI may terminate this agreement by written notice to the User Institution. If this agreement terminates for any reason, the User Institution will be required to destroy any Data held, including copies and backup copies. This clause does not prevent the User Institution from retaining the data for archival purpose in conformity with audit or legal requirements.
17. The User Institution accepts that it may be necessary for the Data Producers to alter the terms of this agreement from time to time. As an example, this may include specific provisions relating to the Data required by Data Producers other than WTSI. In the event that changes are required, the Data Producers or their appointed agent will contact the User Institution to inform it of the changes and the User Institution may elect to accept the changes or terminate the agreement.
18. If requested, the User Institution will allow data security and management documentation to be inspected to verify that it is complying with the terms of this agreement.
19. The User Institution agrees to distribute a copy of these terms to the Authorised Personnel. The User Institution will procure that the Authorised Personnel comply with the terms of this agreement.
20. This agreement (and any dispute, controversy, proceedings or claim of whatever nature arising out of this agreement or its formation) shall be construed, interpreted and governed by the laws of England and Wales and shall be subject to the exclusive jurisdiction of the English courts.

#### APPENDIX I - DATASET DETAILS

|                                                                        |                                                          |
|------------------------------------------------------------------------|----------------------------------------------------------|
| Dataset Reference(s)                                                   |                                                          |
| FAKE_EGA_ID:2569827c-94f9-4bdc-8c7c-d946a30711c0                       |                                                          |
| Name of project that created the dataset                               |                                                          |
| Low-depth whole genome sequencing across multiple isolated populations |                                                          |
| Names of other data producers                                          |                                                          |
| Daniela Toniolo                                                        | DIBIT-San Raffaele Scientific Institute Milano           |
| Veikko Salomaa                                                         | National Institute for Health and Welfare, Finland (THL) |
| Dr. Satu Mannisto                                                      | National Institute for Health and Welfare, Finland (THL) |
| George Dedoussis                                                       | Harokopio University, Athens                             |
| Paolo Gasparini                                                        | Trieste University                                       |
| Dr. Jim Wilson                                                         | The University of Edinburgh                              |
| Professor George Cavey Smith                                           | University of Bristol                                    |
| Tim Spector                                                            | KCL                                                      |

|                                                                                                                                                                                                                                                                                                                                                                                                                                         |                                                                                         |
|-----------------------------------------------------------------------------------------------------------------------------------------------------------------------------------------------------------------------------------------------------------------------------------------------------------------------------------------------------------------------------------------------------------------------------------------|-----------------------------------------------------------------------------------------|
| Aarno Palotie                                                                                                                                                                                                                                                                                                                                                                                                                           | Institute for Molecular Medicine Finland (FIMM), The Broad Institute of MIT and Harvard |
| Specific limitations on areas of research                                                                                                                                                                                                                                                                                                                                                                                               |                                                                                         |
| None.                                                                                                                                                                                                                                                                                                                                                                                                                                   |                                                                                         |
| Minimum protection measures required                                                                                                                                                                                                                                                                                                                                                                                                    |                                                                                         |
| <b>Security Level: 2</b>                                                                                                                                                                                                                                                                                                                                                                                                                |                                                                                         |
| File access: Data can be held in unencrypted files on an institutional compute system, with Unix user group read/write access for one or more appropriate groups but not Unix world read/write access behind a secure firewall. Laptops holding this data should have password protected logins and screenlocks (set to lock after 5 min of inactivity). If held on USB keys or other portable hard drives, the data must be encrypted. |                                                                                         |

#### APPENDIX II - PROJECT DETAILS

|                                                                                                   |  |
|---------------------------------------------------------------------------------------------------|--|
| Details of dataset(s)                                                                             |  |
| FAKE_EGA_ID:2569827c-94f9-4bdc-8c7c-d946a30711c0                                                  |  |
| Description of the project                                                                        |  |
| -- TEST --                                                                                        |  |
| User Institution                                                                                  |  |
| Affiliation: Wellcome Trust Sanger Institute                                                      |  |
| Mailing Address: Wellcome Trust Sanger Institute, Genome Campus, Hinxton, CB101SA, United Kingdom |  |
| Principal Investigator: Stephen Rice                                                              |  |
| Individuals who the User Institution wishes to have access to the Data                            |  |

#### APPENDIX III - PUBLICATION POLICY

|                                                                                                                                                                                                                                                                                                                                                                                                                                |
|--------------------------------------------------------------------------------------------------------------------------------------------------------------------------------------------------------------------------------------------------------------------------------------------------------------------------------------------------------------------------------------------------------------------------------|
| WTSI are committed to the principles of rapid data release. WTSI intend to publish the results of our analysis of this data set and do not consider its deposition into public databases to be the equivalent of such publications. WTSI anticipate that the data set could be useful to other qualified researchers for a variety of purposes. However, some areas of work are therefore subject to a publication moratorium. |
| The publication moratorium covers any publications (including oral                                                                                                                                                                                                                                                                                                                                                             |

communications) that describe the use of the dataset. For research papers, submission for publication should not occur until 12 months after these data were first made available on the relevant hosting database, unless WTSI has provided written consent to earlier submission.

In any publications based on this data, please describe how the data can be accessed, including the name of the hosting database (e.g., The European Genome-phenome Archive at the European Bioinformatics Institute) and its accession numbers (e.g., EGAS00000000029), and acknowledge its use in a form agreed by the User Institution with WTSI.

## Supplementary References

1. Price, A.L. *et al.* Principal components analysis corrects for stratification in genome-wide association studies. *Nat Genet* **38**, 904-909 (2006).
2. Alexander, D.H., Novembre, J. & Lange, K. Fast model-based estimation of ancestry in unrelated individuals. *Genome Res* **19**, 1655-1664 (2009).
3. Pickrell, J.K. & Pritchard, J.K. Inference of population splits and mixtures from genome-wide allele frequency data. *PLoS Genet* **8**, e1002967 (2012).
4. Hill, W.G. Estimation of effective population size from data on linkage disequilibrium. *Genetical Res.* **38**, 209-216 (1981).
5. Hayes, B.J., Visscher, P.M., McPartlan, H.C. & Goddard, M.E. Novel multilocus measure of linkage disequilibrium to estimate past effective population size. *Genome Res* **13**, 635-643 (2003).
6. Tenesa, A. *et al.* Recent human effective population size estimated from linkage disequilibrium. *Genome Res* **17**, 520-526 (2007).
7. Mezzavilla, M. & Ghirotto, S. *Neon*: An R package to estimate human effective population size and divergence time from patterns of linkage disequilibrium between SNPs. *J Comput Sci Syst Biol* **8**, 37-44 (2015).
8. Schiffels, S. & Durbin, R. Inferring human population size and separation history from multiple genome sequences. *Nat Genet* **46**, 919-925 (2014).
9. Browning, S.R. & Browning, B.L. Accurate non-parametric estimation of recent effective population size from segments of identity by descent. *Am J Hum Genet* **97**, 404-418 (2015).
10. Browning, B.L. & Browning, S.R. Detecting identity by descent and estimating genotype error rates in sequence data. *Am J Hum Genet* **93**, 840-851 (2013).
11. Benazzo, A., Panziera, A. & Bertorelle, G. 4P: fast computing of population genetics statistics from large DNA polymorphism panels. *Ecol Evol* **5**, 172-175 (2014).
12. Schliep, K.P. phangorn: phylogenetic analysis in R. *Bioinformatics* **27**, 592-3 (2011).
13. Purcell, S. *et al.* PLINK: a tool set for whole-genome association and population-based linkage analyses. *Am J Hum Genet* **81**, 559-575 (2007).
14. Polasek, O. *et al.* Comparative assessment of methods for estimating individual genome-wide homozygosity-by-descent from human genomic data. *BMC Genomics* **11**, 139 (2010).
15. Gabriel, S.B. *et al.* The structure of haplotype blocks in the human genome. *Science* **296**, 2225-2229 (2002).
16. Wang, H. & Song, M. Ckmeans.1d.dp: optimal k-means clustering in one dimension by dynamic programming. *The R Journal* **3**, 29-33 (2011).
17. Colonna, V. *et al.* Human genomic regions with exceptionally high levels of population differentiation identified from 911 whole-genome sequences. *Genome Biol* **15**, R88 (2014).
18. Field, Y. *et al.* Detection of human adaptation during the past 2000 years. *Science* **354**, 760-764 (2016).
19. The 1000 Genomes Project Consortium. A global reference for human genetic variation. *Nature* **526**, 68-74 (2015).

20. The UK10K Consortium. The UK10K project identifies rare variants in health and disease. *Nature* **526**, 82-90 (2015).
21. Do, R. *et al.* No evidence that selection has been less effective at removing deleterious mutations in Europeans than in Africans. *Nat Genet* **47**, 126-131 (2015).
22. Locke, A.E. *et al.* Genetic studies of body mass index yield new insights for obesity biology. *Nature* **518**, 197-206 (2015).
23. Palmer, N.D. *et al.* Genetic variants associated with quantitative glucose homeostasis traits translate to Type 2 Diabetes in Mexican Americans: The GUARDIAN (Genetics Underlying Diabetes in Hispanics) Consortium. *Diabetes* **64**, 1853-1866 (2015).
24. Comuzzie, A.G. *et al.* Novel genetic loci identified for the pathophysiology of childhood obesity in the Hispanic population. *PLoS One* **7**, e51954 (2012).
25. Brandler, W.M. *et al.* Common variants in left/right asymmetry genes and pathways are associated with relative hand skill. *PLoS Genet* **9**, e1003751 (2013).
26. Athanasiadis, G. *et al.* A genome-wide association study of the Protein C anticoagulant pathway. *PLoS One* **6**, e29168 (2011).
27. Browning, S.R. & Browning, B.L. Rapid and accurate haplotype phasing and missing-data inference for whole-genome association studies by use of localized haplotype clustering. *Am J Hum Genet* **81**, 1084-1097 (2007).
